1 **TITLE:**

2 **Genome-wide association study of multiethnic non-syndromic orofacial cleft families**  
3 **identifies novel loci specific to family and phenotypic subtypes**

4

5 **Authors**

6 Nandita Mukhopadhyay<sup>1\*</sup>, Eleanor Feingold<sup>1,2,3</sup>, Lina Moreno-Uribe<sup>4</sup>, George Wehby<sup>5</sup>, Luz  
7 Consuelo Valencia-Ramirez<sup>6</sup>, Claudia P. Restrepo Muñeton<sup>6</sup>, Carmencita Padilla<sup>7</sup>, Frederic  
8 Deleyiannis<sup>8</sup>, Kaare Christensen<sup>9</sup>, Fernando A. Poletta<sup>10</sup>, Ieda M Orioli<sup>11,12</sup>, Jacqueline T.  
9 Hecht<sup>13</sup>, Carmen J. Buxó<sup>14</sup>, Azeez Butali<sup>15</sup>, Wasiu L. Adeyemo<sup>16</sup>, Alexandre R. Vieira<sup>1</sup>, John R.  
10 Shaffer<sup>1,3</sup>, Jeffrey C. Murray<sup>17</sup>, Seth M. Weinberg<sup>1,3</sup>, Elizabeth J. Leslie<sup>18\*\*</sup>, Mary L.  
11 Marazita<sup>1,3,19\*\*</sup>

12 **\*Correspondence**

13

14 Nandita Mukhopadhyay

15 nandita@pitt.edu

16

17 **AUTHOR AFFILIATIONS**

18 <sup>1</sup> Center for Craniofacial and Dental Genetics, Department of Oral and Craniofacial Sciences,  
19 School of Dental Medicine, University of Pittsburgh, Pittsburgh, PA, 15219 USA

20 <sup>2</sup> Department of Biostatistics, Graduate School of Public Health, University of Pittsburgh,  
21 Pittsburgh, PA, USA

22 <sup>3</sup> Department of Human Genetics, Graduate School of Public Health, University of Pittsburgh,  
23 Pittsburgh, PA, USA

24 <sup>4</sup> Department of Orthodontics, & The Iowa Institute for Oral Health Research, College of  
25 Dentistry, University of Iowa, Iowa City, IA, USA

26 <sup>5</sup> Department of Health Management and Policy, College of Public Health, University of Iowa,  
27 Iowa City, IA, USA

28 <sup>6</sup> Fundación Clínica Noel; Calle 14 # 43B – 146, Medellín, Antioquia, Colombia

29 <sup>7</sup> Department of Pediatrics, College of Medicine, Institute of Human Genetics, National  
30 Institutes of Health, University of the Philippines, Manila, the Philippines

31 <sup>8</sup> UCHealth Medical Group, Colorado Springs, CO. USA

32 <sup>9</sup> Unit of Epidemiology, Department of Public Health, University of Southern Denmark, Odense,  
33 Denmark

34 <sup>10</sup> CEMIC-CONICET: Center for Medical Education and Clinical Research, Buenos Aires,  
35 Argentina.

36 <sup>11</sup> Department of Genetics, Institute of Biology, Federal University of Rio de Janeiro, Rio de  
37 Janeiro, Brazil

38 <sup>12</sup> Instituto Nacional de Genética Médica Populacional INAGEMP, Porto Alegre, Brazil.

39 <sup>13</sup> Department of Pediatrics, University of Texas Health Science Center at Houston, Houston,  
40 TX, USA

41 <sup>14</sup> Dental and Craniofacial Genomics Core, School of Dental Medicine, University of Puerto  
42 Rico, San Juan, Puerto Rico

43 <sup>15</sup> Department of Oral Pathology, Radiology and Medicine and Iowa Institute for Oral Health  
44 Research, College of Dentistry, University of Iowa, Iowa City, IA, USA

45 <sup>16</sup> Department of Oral and Maxillofacial Surgery, College of Medicine, University of Lagos,  
46 Lagos, Nigeria.

47 <sup>17</sup> Department of Pediatrics, Carver College of Medicine, University of Iowa, Iowa City, IA,  
48 USA

49 <sup>18</sup> Department of Human Genetics, Emory University School of Medicine, Atlanta, GA, USA

50 <sup>19</sup> Clinical and Translational Science, School of Medicine, University of Pittsburgh, Pittsburgh,  
51 PA, USA

52 \*\* co-senior-authors

### 53 **ABSTRACT**

54 Orofacial clefts (OFCs) are among the most common craniofacial birth defects and constitute  
55 a high public health burden around the world. OFCs are phenotypically heterogeneous, affecting  
56 only the lip, only the palate, or involving both the lip and palate. Cleft palate alone is  
57 demonstrably a genetically distinct abnormality from OFCs that involve the lip, therefore, it is  
58 common to study cleft lip (CL) in combination with cleft lip plus cleft palate (CLP) as a  
59 phenotypic group (i.e. cleft lip with or without cleft palate, CL/P), usually considering CLP to be  
60 a clinically more severe form of CL. However, even within CL/P, important genetic differences  
61 among subtypes may be present. The Pittsburgh Orofacial Cleft (Pitt-OFC) multiethnic study is a  
62 rich resource for the study of non-syndromic OFC, comprising a large number of families  
63 (~12,000 individuals) from multiple populations worldwide: US and Europe (whites), Central  
64 and South America (mixed Native American, European and African), Asia, and Africa. In this  
65 study we focused on the CL/P families from this resource grouped into three non-overlapping  
66 family types: those with only CL affected members, only CLP affected members, or both CL and  
67 CLP. In all, seven total subtypes besides the combined CL/P phenotype, were defined based on

68 the cleft type(s) that were present within pedigree members. The full sample for these analyses  
69 includes 2,218 CL and CLP cases along with 4,537 unaffected relatives, as well as 2,673 pure  
70 controls with no family history of OFC. Genome-wide association analyses were conducted  
71 within each subset, as well as the combined sample. Five novel genome-wide significant  
72 associations were observed: 3q29 (rs62284390,  $p=2.70E-08$ ), 5p13.2 (rs609659,  $p=4.57E-08$ ),  
73 7q22.1 (rs6465810,  $p=1.25E-08$ ), 19p13.3 (rs628271,  $p=1.90E-08$ ) and 20q13.33 (rs2427238,  
74  $p=1.51E-09$ ). In addition, five significant and four suggestive associations confirmed regions  
75 previously published as OFC risk loci - *PAX7*, *IRF6*, *FAM49A*, *DCAF4L2*, 8q24.21, *ARID3B*,  
76 *NTN1*, *TANC2* and the *WNT9B:WNT3* gene cluster. At each of these loci, we compared effect  
77 sizes of associated SNPs observed across subtypes and the full sample, and found that certain  
78 loci were associated with a specific cleft type, and/or specific family types. Our findings indicate  
79 that risk factors differ between cleft and family types, but each cleft type also exhibits a certain  
80 degree of genetic heterogeneity.

81

## 82 **AUTHOR SUMMARY**

83 Orofacial clefts are common birth defects. Clefts often run in families, but their genetic basis  
84 is still an active area of investigation. In this study, we use an innovative approach to identify  
85 shared and unique genetic risk factors between two types of orofacial clefts - cleft lip and cleft  
86 lip plus cleft palate, by taking the patterns of different cleft types reported in families into  
87 account. Our study provides new insights into previously known genetic risk factors, but also  
88 identifies novel genetic regions that differentially impact the risk of developing cleft lip versus  
89 cleft lip plus cleft palate. This study contributes to the growing evidence that different sets of

90 genes impact different forms of clefting and highlights the importance of incorporating  
91 information about familial affection patterns into analyses.

92

## 93 **INTRODUCTION**

94 Orofacial clefts (OFCs) are among the most common birth defects worldwide. The physical  
95 health effects of OFCs pose social, emotional and financial burdens on affected individuals and  
96 their families [1-3], despite therapies such as surgical treatments, ongoing orthodontia, speech  
97 therapy etc. that are available to reduce these burdens. Similar to other birth-related  
98 malformations, there are disparities in access to the complex medical and surgical therapies for  
99 OFCs[4]. A variety of studies have reported a reduced quality of life for children with OFC [5],  
100 as well as a higher risk of certain types of cancers in adulthood [6-8]. Thus, identifying etiologic  
101 factors responsible for OFCs is a very important tool for determining risk, designing prevention  
102 methods, and determining the extent of therapeutic and social support needed by individuals with  
103 OFCs and their families.

104 OFCs are heterogeneous with varying manifestations and severity but are typically  
105 categorized into three subtypes: cleft lip alone (CL), cleft palate alone (CP), and cleft lip plus  
106 cleft palate (CLP). These can be syndromic (i.e. part of a spectrum of multiple defects due to a  
107 single cause), but the majority, about 70% of CL with or without CP (CL/P) and 50% of CP, are  
108 non-syndromic (i.e. the only defect present without any other detectable cognitive or structural  
109 abnormality) [9]. Many of the genes responsible for Mendelian forms of syndromic OFCs have  
110 been identified (OMIM, <https://www.omim.org/search/advanced/geneMap>) as have some  
111 teratogenic causes (ref?). In contrast, our understanding of the genetic causes of non-syndromic  
112 OFCs (nsOFCs) remains incomplete due to the complex nature of these defects, despite studies

113 over a number of years [10, 11]. Not only are there differences in birth prevalence around the  
114 world with respect to any nsOFC, the prevalence of the various subtypes (CL, CLP, CP) also  
115 varies substantially, suggesting etiological differences in the genetic factors giving rise to these  
116 different forms of nsOFC. These differences likely reflect the fact that human craniofacial  
117 development is a multi-stage process involving complex interactions between genetic and  
118 environmental factors [11].

119 Historically, CL and CLP have been treated as variants of the same defect based on  
120 embryological origins of the upper lip and secondary palate, with CLP being considered a more  
121 severe form of CL [14]. Analysis of recurrence risk among siblings have shown that the cross-  
122 subtype recurrence risk ratio between CL and CLP is higher than between CP and either CL or  
123 CLP [15], and analyzing the composite phenotype with lip involvement (CL/P) within  
124 association analyses have resulted in consistently stronger signals, than analyzing all three (CL,  
125 CLP, CP) as a combined phenotype. Therefore, CP has been treated as being genetically distinct  
126 from nsOFCs involving the lip. More recently, it has been shown that CL and CLP have shared  
127 and unique etiological factors, therefore, recent genetic studies have focused on investigating  
128 etiological differences between CL and CLP, including both candidate gene approaches [16, 17]  
129 as well as genome-wide association study (GWAS) approaches [18-20].

130 Our current study focuses on nsOFC and investigates whether CL is etiologically different  
131 from CLP by considering the types of clefts segregating within families. This family-type based  
132 approach was previously used for genome-wide linkage-analyses [21], but has not been  
133 employed for GWASs. Following a methodology similar to the prior family-based analysis for  
134 partitioning families [21], we created several GWAS samples and phenotypes, as defined in the  
135 Terminology section below, and described in detail in Methods. This approach stands in contrast

136 to previous GWASs, including those utilizing Pittsburgh Orofacial Cleft Study (Pitt-OFC)  
137 participants [12, 13] that have focused only on the *individual* subjects' cleft types (see e.g. table  
138 04.02 in [11]). The Pitt-OFC resource is a rich collection of nsOFC families across multiple  
139 racial/ethnic groups, including simplex, multiplex, and extended pedigrees (~12,000 participants)  
140 with precise and detailed information on the types of nsOFC observed within multiple  
141 generations of the relatives of the probands. This resource is therefore well suited to  
142 investigating differences between the genetic etiology of CL vs. that of CLP. Study samples were  
143 genotyped on a custom whole genome genotyping array, followed by imputation using the 1000  
144 Genomes Project reference panel (phase 3). In our current study, we selected families containing  
145 one or more individuals affected with CL and/or CLP, excluding families with only CP.

#### 146 **Terminology**

147 Three non-overlapping types of families were considered: **CL** – all affected members have  
148 CL; **CLP** - all affected members have CLP; and **CL+CLP** - families containing CL as well as  
149 CLP affected members. Further, **CL+** designates the union of CL and CL+CLP families, **CLP+**  
150 designates the union of CLP and CL+CLP families, and **POFC** is used to designate the union of  
151 **CL**, **CLP** and **CL+CLP**. Eight phenotype analysis subgroups were then defined on these family  
152 types for analysis. The following designations list the OFC phenotype analysis subgroups with a  
153 subscript for the family type(s) included in each: **CL/P**<sub>[POFC]</sub> is the full sample analyzed by  
154 assigning a positive affection status to both CL- and CLP-affected subjects. **CL**<sub>[CL]</sub> is the GWAS  
155 sample and phenotype including pedigrees with only CL-affected (no CLP-affected) members,  
156 and **CLP**<sub>[CLP]</sub> only CLP-affected (no CL-affected). **CL/P**<sub>[CL+CLP]</sub> is the sample and phenotype  
157 consisting of pedigrees with both CL and CLP affecteds, assigning a positive affection status to  
158 both CL and CLP members. Similarly, **CL**<sub>[CL+CLP]</sub> and **CLP**<sub>[CL+CLP]</sub> are samples also consisting

159 of pedigrees with both CL and CLP affecteds, but with only CL members set to affected (CLP  
160 members excluded), or only CLP members set to affected (CL members excluded) respectively.  
161 Finally,  $CL_{[CL+]}$  and  $CLP_{[CLP+]}$  are samples consisting of the CL+ or CLP+ family groups;  
162 respectively, but with only CL members set to affected (CLP members excluded), or only CLP  
163 members set to affected (CL members excluded). Fig 1 shows the GWAS sample definition and  
164 phenotype assignment used in this study. Table 1 lists selected prior studies of OFC types on  
165 Pitt-OFC subjects that most closely resemble the subset and phenotypes analyzed in our study.

166 Table 1. Comparison of previous published analyses on Pitt-OFC

| <b>Prior Study</b>        | <b>Study type/goal</b>                            | <b>Approach</b>                                                                              | <b>Correspondence to current study subsets</b> |
|---------------------------|---------------------------------------------------|----------------------------------------------------------------------------------------------|------------------------------------------------|
| Marazita et al. 2009 [21] | Genome-wide linkage, fine-mapping                 | Parametric linkage (HLOD) and FBAT                                                           | $CL/P_{[POFC]}$ , $CL_{[CL]}$ , $CLP_{[CLP]}$  |
| Leslie et al. 2017 [13]   | GWAS                                              | TDT, case-control association and meta-analysis                                              | $CL/P_{[POFC]}$                                |
| Carlson et al. 2019 [16]  | Heterogeneity within OFC in targeted gene regions | GWAS, meta-analysis, and heterogeneity Q-statistic with permutation testing for significance | $CL_{[CL+]}$ , $CLP_{[CLP+]}$                  |

167  
168 Since the degree of OFC risk at certain susceptibility loci varies with ancestry [22], the effect  
169 of ancestry was incorporated into our analyses. The four ancestry groups used to classify study  
170 participants are AFR (African ancestry), ASIA (Asian ancestry), EUR (white, European  
171 ancestry) and CSA (Central and South American ancestry). EAF is used to denote the effect



172 allele frequency within a specified subset of participants. LD  $r^2$  is used to denote linkage  
173 disequilibrium between variants as observed within the POFC sample.

174

175 Fig 1. Creation of analytical subsets and phenotype assignment for GWAS.

176 Fig 1 caption. Each colored rectangle is a GWAS phenotypic subset; included pedigree type(s)  
177 shown for each subset; shaded squares and circles indicate participants with an OFC; shaded  
178 circles and squares with solid outlines indicate **affected** subjects; unshaded squares and circles  
179 with solid outlines represent **unaffected** subjects; circles and squares with dotted outlines  
180 represent pedigree members **excluded** from the GWAS; designations for OFC phenotype  
181 analysis subgroups including a subscript for the family type(s) are:

182 (A)  $\mathbf{CL/P}_{\text{POFC}}$ : full set of [CL], [CLP] and [CL+CLP] pedigrees, CL and CLP members set  
183 to affected;

184 (B)  $\mathbf{CL}_{\text{[CL]}}$ : in [CL] pedigrees, CL members are set to affected;

185 (C)  $\mathbf{CLP}_{\text{[CLP]}}$ , in [CLP] pedigrees CLP members are set to affected;

186 (D)  $\mathbf{CL/P}_{\text{[CL+CLP]}}$ , in [CL+CLP] pedigrees, CL and CLP members are set to affected;

187 (E)  $\mathbf{CL}_{\text{[CL+CLP]}}$ , in [CL+CLP] pedigrees, CL members set to affected, CLP members  
188 excluded;

189 (F)  $\mathbf{CLP}_{\text{[CL+CLP]}}$ , in [CL+CLP] pedigrees, CLP members are set to affected and CL members  
190 excluded;

191 (G)  $\mathbf{CL}_{\text{[CL+]}}$ , in [CL+] pedigrees (i.e. [CL] plus [CL+CLP] pedigrees), CL members are set to  
192 affected and CLP members excluded;

193 (H)  $\mathbf{CLP}_{\text{[CLP+]}}$ , in [CLP+] pedigrees (i.e. [CLP] plus [CL+CLP] pedigrees), CLP members  
194 are set to affected and CL members excluded.

195 Note: Affected sibships are shown as examples – data includes other pedigree types including  
196 multi-generational pedigrees.

## 197 **RESULTS**

198 In our study, GWASs of eight separate phenotypes were run on eight corresponding  
199 phenotypic subsets created by grouping the POFC pedigrees based on the type of OFCs (CL  
200 and/or CLP) observed within those pedigrees. The full sample was analyzed for the CL/P  
201 phenotype (CL/P<sub>[POFC]</sub>), and seven other phenotype/family groups, CL<sub>[CL]</sub>, CLP<sub>[CLP]</sub>,  
202 CL/P<sub>[CL+CLP]</sub>, CL<sub>[CL+CLP]</sub>, CLP<sub>[CL+CLP]</sub>, CL<sub>[CL+]</sub> and CLP<sub>[CLP+]</sub> were defined, and analyzed using  
203 GWASs. For each phenotype, pedigrees were further grouped according to their population  
204 ancestry groups, and GWASs run separately within each group. Subsequently, association  
205 outcomes for the ancestry groups were meta-analyzed to determine association for each of the  
206 eight phenotypic subsets. The procedure followed for creating and analyzing the eight  
207 phenotypic subgroups is described in the Methods section. Genome-wide meta-analysis resulted  
208 in several significant and suggestive associations, both at previously reported OFC loci, and five  
209 novel regions.

210

### 211 **Significant and suggestive loci identified by meta-analysis**

212 Meta-analysis over the ancestry groups for each of the eight phenotypes resulted in fourteen  
213 unique loci of interest. These included five novel loci with genome-wide Bonferroni significant  
214 meta-analysis p-values ( $p < 5.0e-08$ ) and an additional nine known OFC loci with p-values  
215 below  $1.0E-06$ . Table 2 lists the most significant meta-analysis p-value, effect size (expressed as  
216 betas), 95% CI of the effect size, and the variant positions that showed significant ( $p < 5.0e-08$ )  
217 or suggestive ( $p < 1.0e-05$ ) associations. Supplementary Table S1 provides more detailed

218 information for all variant positions corresponding to the p-values shown in Table 2, such as RS  
219 numbers, base pair positions, and effect allele frequencies (EAFs) within the affected subjects  
220 included for GWAS of that phenotype.

221 The five novel associations observed are: (i) 3q29, most significantly associated with the  
222  $CL_{[CL+CLP]}$  subtype, (ii) 5q13.2, most significantly associated with the  $CL_{[CL+]}$  subtype, (iii)  
223 7q22.1 showing the strongest association with the  $CLP_{[CL+CLP]}$  subtype, (iv) 19p13.3 also  
224 showing the strongest association with the  $CLP_{[CL+CLP]}$  subtype, and (v) 20q13.3, associated with  
225 the  $CL_{[CL]}$  subtype.

226 The known OFC loci recapitulated here include the genes *PAX7*, *IRF6*, *FAM49A*, *DCAF4L2*,  
227 *ARID3B*, *NTN1*, *WNT9B:WNT3*, *TANC2*, and the 8q24.21 locus. Among these, *PAX7*, *FAM49A*,  
228 *DCAF4L2*, *ARID3B*, and *WNT9B:WNT3* are associated with both CL and CLP. The *IRF6* locus  
229 is the most strongly associated with the  $CL_{[POFC]}$  subtype, *TANC2* with the  $CL_{[CL]}$  subtype, and  
230 *NTN1* with  $CLP_{[CLP]}$  subtype. The 8q24.21 locus has traditionally been treated as a single locus,  
231 however, the prior CL/P GWAS study using samples from Pitt-OFC reported two distinct peak  
232 regions with genome-wide significant association p-values (Leslie et al. [12]). In the current  
233 study, we also observed two distinct peak regions at this locus. Both peaks are most strongly  
234 associated with the  $CL/P_{[POFC]}$  subtype.

235 Table 2. Loci with meta-analysis p-value  $\leq 1.0E-06$  in one or more GWASs

| Locus                                 | CL/P <sub>[POFC]</sub>                          | CL <sub>[CL+]</sub>                            | CL <sub>[CL]</sub>                           | CL <sub>[CL+CLP]</sub>                        | CLP <sub>[CLP+]</sub>                   | CLP <sub>[CLP]</sub>                           | CLP <sub>[CL+CLP]</sub>                     | CL/P <sub>[CL+CLP]</sub>                |
|---------------------------------------|-------------------------------------------------|------------------------------------------------|----------------------------------------------|-----------------------------------------------|-----------------------------------------|------------------------------------------------|---------------------------------------------|-----------------------------------------|
| 1p36.13 ( <i>PAX7</i> )               | <b>rs9439714 (C)</b><br>5.9E-09, 0.24 ± 0.08    | 1.6E-04, 0.87 ± 0.45                           | 8.0E-05, 1.23 ± 0.61                         | 1.0E-04, 1.16 ± 0.58                          | rs56675509 (C)<br>5.3E-08, 0.26 ± 0.09  | rs11583072 (T)<br>1.7E-08, 0.28 ± 0.1          | 7.1E-04, 1.11 ± 0.64                        | 2.3E-04, 0.28 ± 0.15                    |
| 1q32.2 ( <i>IRF6</i> )                | rs926348<br>4.2E-09, -0.21 ± 0.07               | <b>rs67652997 (A)</b><br>3.0E-09, -0.41 ± 0.13 | rs72751420 (C)<br>4.3E-07, 1.33 ± 0.51       | rs67652997 (A)<br>1.5E-07, -0.57 ± 0.21       | 2.0E-06, -0.28 ± 0.11                   | 5.4E-06, -0.29 ± 0.12                          | 7.9E-04, -0.39 ± 0.23                       | rs12403599 (C)<br>2.5E-07, -0.39 ± 0.14 |
| 2p24.2-p24.3 ( <i>FAM49A</i> )        | <b>rs7552 (G)</b><br>1.2E-07, 0.19 ± 0.07       | 2.5E-04, 0.25 ± 0.14                           | 9.0E-04, 0.32 ± 0.19                         | 6.0E-05, 1.05 ± 0.51                          | 6.4E-06, 0.19 ± 0.08                    | 2.6E-04, 0.17 ± 0.09                           | 5.7E-05, 0.37 ± 0.18                        | 7.3E-05, 0.30 ± 0.15                    |
| 3q29 <sup>†</sup>                     | 4.8E-05, 0.22 ± 0.11                            | 5.0E-04, 0.80 ± 0.45                           | 3.0E-04, 0.66 ± 0.35                         | <b>rs62284390 (T)</b><br>2.7E-08, 2.86 ± 0.99 | 1.4E-04, 0.24 ± 0.12                    | 1.7E-04, 0.26 ± 0.14                           | 5.5E-04, 0.83 ± 0.47                        | 2.6E-05, 1.21 ± 0.56                    |
| 5q13.2 <sup>†</sup>                   | 1.1E-03, -0.12 ± 0.07                           | <b>rs609659 (G)</b><br>4.6E-08, -0.39 ± 0.14   | 1.6E-06, -0.47 ± 0.19                        | 6.9E-04, -0.50 ± 0.29                         | 1.2E-04, 0.32 ± 0.16                    | 2.1E-03, 0.29 ± 0.18                           | 4.1E-03, 0.28 ± 0.19                        | 3.4E-03, -0.47 ± 0.32                   |
| 7q22.1 <sup>†</sup>                   | 4.9E-04, 0.16 ± 0.09                            | 1.8E-03, 0.32 ± 0.2                            | 5.2E-03, 1.33 ± 0.93                         | 1.8E-04, 1.17 ± 0.61                          | 1.7E-03, 0.20 ± 0.13                    | 2.2E-03, 0.27 ± 0.17                           | <b>rs6465810 (C)</b><br>1.2E-08, 1.17 ± 0.4 | rs6465810 (C)<br>5.7E-07, 0.78 ± 0.3    |
| 8q21.3 ( <i>DCAF4L2</i> )             | <b>rs12543318 (C)</b><br>5.4E-10, 0.22 ± 0.07   | 3.6E-05, 0.27 ± 0.13                           | 7.6E-04, -0.33 ± 0.19                        | 1.1E-03, 0.44 ± 0.26                          | rs12543318 (C)<br>2.9E-08, 0.22 ± 0.08  | 4.5E-06, 0.21 ± 0.09                           | 8.8E-06, 0.39 ± 0.17                        | 6.2E-06, 0.32 ± 0.14                    |
| 8q24.21 ( <i>p-ter</i> )              | <b>rs7839784 (T)</b><br>2.2E-14, 0.34 ± 0.08    | rs55768865 (G)<br>5.2E-09, 0.88 ± 0.29         | rs55768865 (G)<br>5.1E-07, 1.04 ± 0.4        | 1.9E-05, 1.04 ± 0.47                          | rs5894949 (A)<br>2.2E-11, 0.33 ± 0.09   | rs55768865 (G)<br>5.6E-10, 0.56 ± 0.17         | 2.8E-06, 0.54 ± 0.22                        | rs55768865 (G)<br>1.9E-07, 0.84 ± 0.31  |
| 8q24.21 ( <i>q-ter</i> )              | <b>rs72728755 (A)</b><br>3.1E-32, 0.58 ± 0.09   | rs72728755 (A)<br>6.4E-13, 0.72 ± 0.19         | rs112704402 (A)<br>1.3E-08, 0.74 ± 0.25      | rs72728755 (A)<br>1.5E-08, 0.91 ± 0.31        | rs72728755 (A)<br>1.5E-26, 0.59 ± 0.1   | rs72728755 (A)<br>8.6E-20, 0.58 ± 0.12         | rs72728755 (A)<br>1.7E-14, 1.04 ± 0.26      | rs72728755 (A)<br>1.2E-16, 0.89 ± 0.2   |
| 15q24.2-q24.1 ( <i>ARID3B</i> )       | <b>rs58691516 (CT)</b><br>6.7E-07, -0.20 ± 0.08 | 9.0E-06, -0.40 ± 0.17                          | 1.2E-03, 0.35 ± 0.21                         | 3.2E-04, -0.39 ± 0.21                         | 4.0E-05, -0.19 ± 0.09                   | 5.7E-06, -0.24 ± 0.1                           | 1.2E-04, -0.48 ± 0.24                       | 9.2E-04, -0.30 ± 0.18                   |
| 17p13.1 ( <i>NTN1</i> )               | rs12944377 (C)<br>6.3E-09, -0.22 ± 0.07         | 1.5E-04, -0.29 ± 0.15                          | 1.6E-04, -0.39 ± 0.2                         | 3.3E-03, 0.32 ± 0.21                          | rs12944377 (C)<br>1.7E-09, -0.26 ± 0.08 | <b>rs12944377 (C)</b><br>5.8E-11, -0.31 ± 0.09 | 5.8E-04, 0.75 ± 0.43                        | 1.6E-04, 0.29 ± 0.15                    |
| 17q21.31-q21.32 ( <i>WNT9B:WNT3</i> ) | <b>rs7216951 (T)</b><br>3.0E-07, -0.22 ± 0.08   | 9.2E-04, -0.40 ± 0.24                          | 3.5E-03, -0.31 ± 0.21                        | 5.4E-04, -0.60 ± 0.34                         | rs7216951 (T)<br>4.8E-07, -0.25 ± 0.09  | 3.6E-06, -0.26 ± 0.11                          | 7.3E-04, -0.52 ± 0.3                        | 1.4E-03, 0.23 ± 0.14                    |
| 17q23.3-q23.2 ( <i>TANC2</i> )        | 2.6E-06, -0.22 ± 0.09                           | 1.2E-04, 0.30 ± 0.15                           | <b>rs17683292 (C)</b><br>1.0E-07, 0.56 ± 0.2 | 1.3E-04, -0.42 ± 0.22                         | 1.7E-05, -0.23 ± 0.1                    | 6.4E-06, -0.23 ± 0.12                          | 7.1E-04, -0.73 ± 0.42                       | 1.8E-03, -0.58 ± 0.36                   |
| 19p13.3 <sup>†</sup>                  | 1.5E-03, 0.33 ± 0.2                             | 6.4E-04, 0.25 ± 0.14                           | 1.1E-03, 0.76 ± 0.46                         | 2.9E-03, 0.39 ± 0.26                          | 1.4E-04, 0.44 ± 0.23                    | 2.4E-03, 0.41 ± 0.27                           | <b>rs628271 (C)</b><br>1.9E-08, 1.68 ± 0.58 | 1.7E-04, 0.92 ± 0.48                    |
| 20q13.33 <sup>†</sup>                 | 2.2E-04, -0.30 ± 0.16                           | 1.3E-04, 0.85 ± 0.43                           | <b>rs2427238 (G)</b><br>1.5E-09, 1.94 ± 0.62 | 4.6E-05, 0.89 ± 0.42                          | 4.4E-05, -0.37 ± 0.18                   | 8.2E-05, -0.40 ± 0.2                           | 5.0E-04, 0.83 ± 0.47                        | 3.4E-04, 0.68 ± 0.37                    |

236 Note: For each locus and GWAS, meta-analysis p-value, beta estimate and its 95% CI are shown; RS numbers and their effect alleles

237 (in parentheses) are shown for suggestive and significant associations - SNPs with the most significant p values at a locus may differ

238 across the GWASs,; † novel loci; p-values  $\leq 5.0E-08$  highlighted in dark green and p-values  $\leq$   
239 1.0E-06 in light green; smallest p-value across subtypes highlighted in bold; two distinct  
240 association peaks in 8q24.21 locus listed separately.

## 241 **Identification of loci associated with specific cleft and/or family subtypes**

242 Based on the strength of association and location of the most significant variants across  
243 subtypes, six previously reported OFC loci, *PAX7*, *FAM49A*, *DCAF4L2*, the 8q24.21 locus,  
244 *ARID3B*, *WNT9B:WNT3* and a novel locus 7q22.1 appear to be associated with both CL and  
245 CLP, i.e., the CL/ $P_{[POFC]}$  meta p-values were the most significant at these loci with subtypes  
246 represented by the larger samples -  $CLP_{[CLP+]}$  and  $CLP_{[CLP]}$  - produced more significant  
247 association p-values as compared to the subtypes with smaller samples. The remaining nine loci  
248 produced more significant p-values within a cleft or a family subtype. We hypothesized that the  
249 differences in p-values could be the result of the sample size differences between phenotypic  
250 subtypes. We therefore compared the estimated meta-analysis effect sizes of the associated  
251 variants within each of 15 peak regions identified above obtained for the eight phenotypes. This  
252 was done to verify whether the degree of risk for developing an OFC differed by OFC type  
253 and/or family type.

254 Table 2 lists the estimated beta coefficients and 95% confidence intervals for the top  
255 associated variant at each locus and for each subtype GWAS. The comparison showed  
256 statistically significant differences between the meta-analysis beta coefficients between subtypes  
257 at five of the associated loci, both between cleft subtypes (i.e.  $CL_{[CL+]}$  vs.  $CLP_{[CLP+]}$ ) and  
258 between family subtypes (i.e.  $CL_{[CL]}$ ,  $CLP_{[CLP]}$ ,  $CL_{[CL+CLP]}$  and  $CLP_{[CL+CLP]}$ ). A comparison of the  
259 ancestry-specific beta coefficients also showed variation similar to the meta-analysis effect sizes.  
260 A comparison of the frequency of the effect allele within affected individuals included in the  
261 phenotypic subsets showed that subtype-specific variants occurred at varying frequencies  
262 between subgroups. Overall, case allele frequencies were observed to differ between subtypes if  
263 effect sizes varied between subtypes, and vice versa.

264 Three of the loci considered as being associated with a specific subtype, are presented in  
265 figures 2-4 below. Fig 2 shows the *IRF6* locus; Fig 3 and Fig 4 show two interesting novel loci -  
266 20q13.33 and 3q29; each containing multiple variants associated with genome-wide significant  
267 and/or suggestive p-values. These three figures illustrate that subtype-specific differences in  
268 strength of association mostly correspond to effect size differences, and also to differences in  
269 frequency of the effect allele amongst affected subjects (referred to as case EAFs) belonging to  
270 these subtypes. Differences in effect sizes and case EAFs that are observed at the meta-analysis  
271 level are also seen within ancestry groups, especially the two largest ones - CSA and EUR.

272 In each figure, the top panel (a) shows a regional Manhattan plot with the most significant  
273 association per subtype – the top associations are labelled in order of their genomic position.  
274 Panel (b) in each figure shows the LD pattern of variants with p-value below 0.001 as that locus -  
275 LD  $r^2$  values above 0.2 shaded as indicated, and top associations labelled as in panel (a). Overall,  
276 LD patterns between top associations from the subtypes are as expected, i.e. LD is high between  
277 subtype-specific associations that are in close proximity, low ( $> 0.2$ ) otherwise. Panel (c) shows  
278 the effect size estimates (beta coefficient and 95% CI) for the labelled associations for all  
279 subtypes – effect size estimates of significant and suggestive associations are identified in the  
280 forest plot, and the lead SNP name outlined. Panel (d) compares ancestry-subgroup specific  
281 effect sizes for either the two cleft subtypes ( $CL_{[CL+]}$  and  $CLP_{[CLP+]}$ ), or the four family subtypes  
282 ( $CL_{[CL]}$ ,  $CLP_{[CLP]}$ ,  $CL_{[CL+CLP]}$ ,  $CLP_{[CL+CLP]}$ ) at the lead SNP depending on which comparisons  
283 indicated subtype specificity. Panel (e) compares effect allele frequency within affected subjects  
284 in each subtype to that of controls at the lead SNP by ancestry. The observed variation in effect  
285 sizes across subtypes corresponds to differences in case EAFs, i.e. case EAFs within subtypes

286 differ from one another, if the effect sizes are different, with a single exception – the 5q13.2  
287 locus, which is further explored in the next section.

288 1. Loci specific to the CL cleft-subtype

289 The novel locus at **5q13.2**, and the known **1q32.2 (*IRF6*)** locus show the most significant  
290 association for the CL<sub>[POFC]</sub> cleft subtype. Fig 2 shows the *IRF6* locus in detail: the regional  
291 Manhattan plot (Fig 1a) shows six distinct variants (labelled A-F) with the most significant p-  
292 values from the subtype meta-analyses. The top association for CL<sub>[CL+]</sub> coincides with the top  
293 CL<sub>[CL+CLP]</sub> variant (SNP D: rs67652997 in Fig 2c), although the latter shows lower significance,  
294 and the top associations for CLP<sub>[CLP+]</sub> and CLP<sub>[CLP]</sub> also coincide (SNP B: rs2076149). LD  
295 between variants with significance p-values (below 0.001) is shown for the 209.92-209.98 KB  
296 region spanning five of these variants (A-E); the top CL<sub>[CL]</sub> association is not shown - it is in low  
297 LD with the rest of the top associations.

298 The largest CL effect size is observed for the CL<sub>[CL+]</sub> subtype, as can be seen in Fig 2c for  
299 *IRF6*. The CL<sub>[CL+]</sub> subtype's effect sizes at the lead SNP rs609659, as well as nearby variants in  
300 LD with the lead SNP is distinctly larger in magnitude than for the CLP<sub>[CLP+]</sub> subtype. Effect  
301 sizes for the CL<sub>[CL]</sub> and CL<sub>[CL+CLP]</sub> family-based subtypes are also larger than the CLP<sub>[CLP]</sub> and  
302 CLP<sub>[CL+CLP]</sub> effect sizes, while CL<sub>[CL]</sub> and CL<sub>[CL+CLP]</sub> effect sizes are not statistically different.  
303 These loci show stronger association to CL, attributable to both the CL<sub>[CL]</sub> and CL<sub>[CL+CLP]</sub> family  
304 subtypes. Within the *IRF6* gene, the lead variant is observed to have a protective effect on CL  
305 risk and observed at a lower frequency than the non-effect allele within cases in EUR and CSA.  
306 Within ASIA and AFR, effect sizes appear to be similar between CL<sub>[CL+]</sub> and CLP<sub>[CLP+]</sub>. At the  
307 5q13.2 locus, the ancestry subgroup-specific effect sizes are consistent with the meta-analysis  
308 effect sizes within the ASIA, EUR and CSA subgroups, i.e. CL<sub>[CL+]</sub> effect sizes are larger in



309 magnitude than  $CLP_{[CLP+]}$ . Beta coefficients overlap within the AFR subgroup. The EAF within  
310  $CL_{[CL+]}$  affecteds of all ancestries pooled is not different from the EAF in  $CLP_{[CLP+]}$  cases, unlike  
311 variants within the other subtype-specific loci. However, this appears to be due to EAF  
312 differences across ancestry groups: in AFR, the  $CL_{[CL+]}$  EAF is smaller than the  $CLP_{[CLP+]}$ , while  
313 the reverse is true in ASIA, EUR and CSA (supplement Fig S1).

314

315 Fig 2. *IRF6* locus specific to  $CL_{[CL+]}$  subtype

316 Fig 2 caption - (a) regional Manhattan plot consisting of six distinct variants (A-F) with the most  
317 significant p-value from each subtype; (b) LD  $r^2$  values  $> 0.2$  between variants (A-E) with p-  
318 value below 0.001, variant F is in a separate LD block from the A-E; (c) beta coefficient and  
319 95% CI for variants A-F, D: lead variant at this locus, \*\* significant and \* suggestive  
320 associations; (d) effect sizes and (e) effect allele frequency within affected subjects for cleft  
321 subtypes  $CL_{[CL+]}$  vs.  $CLP_{[CLP+]}$  by ancestry-subgroup.

322

## 323 2. Loci specific to the $CL_{[CL]}$ family-subtype

324 At two peak regions, the novel locus at 20q13.33, and 17q23.2;q23.3 (*TANC2*), the  $CL_{[CL]}$   
325 meta-analysis p-value is the most significant, and the  $CL_{[CL]}$  meta-analysis effect sizes are much  
326 larger than the other family-type based subsets. Notably, the  $CL_{[CL+]}$  effect size is not different  
327 from the  $CLP_{[CLP+]}$  subtype. Fig 3 highlights the main association outcomes at the 20q13.33  
328 locus. As seen in Fig 3d, the variation in beta estimates within the CSA and EUR subgroups  
329 correspond to the variation observed within the overall meta-analysis beta estimates, and the lead  
330 variant for  $CL_{[CL]}$  shows a positive effect size (beta), while other effect sizes are close to zero.  
331 The effect allele was not observed in  $CL_{[CL]}$  families from ASIA, and AFR was excluded from

332 the family-subtype comparison (Fig 3e). At the other locus showing association within the  $CL_{[CL]}$   
333 subtype - *TANC2*, effect size differences were observed in the EUR and CSA group, with  
334 differences observed in the ASIA group. Further, within the CSA group, the  $CL_{[CL]}$  subtype  
335 showed a positive effect whereas the  $CL_{[CL+CLP]}$  subtype showed a negative effect, which was not  
336 the case for EUR. EAFs within the affecteds were consistently highest in the  $CL_{[CL]}$  subtype  
337 sample than the other family-subtypes, and the effect allele is least frequent in ASIA  
338 (Supplement Fig S2).

339 Fig 3. 20q13.3 novel locus specific to  $CL_{[CL]}$  subtype

340 Fig 3 Caption. (a) regional Manhattan plot consisting of five distinct variants (A-E) with the  
341 most significant p-value from each subtype; (b) LD  $r^2$  values  $> 0.2$  between variants (A-E) with  
342 p-value below 0.001; (c) beta coefficient and 95% CI for variants A-E, D: lead variant at this  
343 locus, \*\* significant associations; (d) effect sizes and (e) effect allele frequency within affected  
344 subjects for family subtypes  $CL_{[CL]}$ ,  $CL_{[CL+CLP]}$ ,  $CLP_{[CLP]}$  and  $CLP_{[CL+CLP]}$  by ancestry-subgroup.  
345

### 346 3. *3q29 locus specific to $CL_{[CL+CLP]}$ family-subtype*

347 The **3q29 novel locus** is more strongly associated with the  $CL_{[CL+CLP]}$  subtype than any other  
348 subtype (Fig 4). There is low LD between SNPs associated with different subtypes as seen in Fig  
349 4b. The  $CL_{[CL+CLP]}$  subtype's effect size is much larger than that of other subtypes also resulting  
350 in a significant difference between the  $CL_{[CL+]}$  subtype's effect size and the  $CLP_{[CLP+]}$  subset's  
351 effect size (Fig 4c and 4d). The **3q29** locus is another instance where ancestry plays a role. The  
352 elevated beta in  $CL_{[CL+CLP]}$  is due to samples of EUR ancestry, and the corresponding EAF in the  
353 EUR subgroup is also much higher than EAFs of other family subtypes (Fig 4e). Effect size  
354 variation is not observed in CSA, which is consistent with similar case EAFs in CSA, and the

355 effect allele is very rarely observed in ASIA. When effect sizes from the ancestry-based  
356 subgroups are examined, the difference between  $CL_{[CL]}$  and  $CL_{[CL+CLP]}$  effect sizes is observed in  
357 the EUR subgroup, but not in ASIA and CSA.

358 Fig 4. 3q29 novel locus specific to  $CL_{[CL+CLP]}$  subtype

359 Fig 4 caption - (a) regional Manhattan plot consisting of six distinct variants (A-F) with the most  
360 significant p-value from each subtype; (b) LD  $r^2$  values  $> 0.2$  between variants (A-F) with p-  
361 value below 0.001; (c) beta coefficient and 95% CI for variants A-F, E: lead variant at this locus,  
362 \*\* significant associations; (d) effect sizes, and (e) effect allele frequency within affected  
363 subjects for family subtypes  $CL_{[CL]}$ ,  $CL_{[CL+CLP]}$ ,  $CLP_{[CLP]}$  and  $CLP_{[CL+CLP]}$  by ancestry-subgroup.  
364

#### 365 4. *Locus specific to $CLP_{[CL+CLP]}$ family-subtype*

366 The **19p13.3 peak** includes a single Bonferroni-significant association at SNP rs628271;  
367 with no other neighboring variants reaching a suggestive level of significance, this may not be a  
368 reliable association. Even so, interestingly the effect size of this variant for the  $CLP_{[CL+CLP]}$   
369 subtype is larger than all the other family-based subtypes. The  $CL_{[CL+]}$  subtype effect size is  
370 similar to the  $CLP_{[CLP+]}$  effect size. This difference is observed in CSA and EUR, but not in  
371 ASIA.

372

#### 373 5. *Loci with no variation in subtype-specific effect sizes:*

374 At the following loci, the subtype-specific effect sizes are similar in magnitude and direction  
375 to those from the other subtypes, indicating that that these loci affect the risk of both CL and  
376 CLP to a similar extent regardless of family classification: 1p36.13 (*PAX7*), 2p24.2-24.3  
377 (*FAM49A*), 7q22.1 - novel locus, 8q21.3 (*DC4FL2*), both peaks within 8q24.1, 15q24.1;q24.2

378 (*ARID3B*), 17p13.1 (*NTN1*), and 17q21.31;q21.32 (*WNT9B;WNT3*). At these loci, larger samples  
379 yielded more significant association p-values.

## 380 **DISCUSSION**

381 For the five novel loci observed in our study, a bioinformatics search yielded interesting, but  
382 not conclusive indication of their roles in the development of OFCs. The lead variant within  
383 5q13.2 is in close proximity to the *TMEM1* gene, and the lead variant within the 20q13.33 locus  
384 is intronic to the *CDH4* gene; both *TMEM1* and *CDH4* are involved in the Wnt signaling  
385 pathway, known to be involved in the development of OFCs. The lead variant in our 3q29 locus  
386 is located approximately 1 MB downstream of the *DLG1* gene, reported as being associated with  
387 CL/P in a recent study of CL/P on a Polish population [23]. In our study, however, we observed  
388 only weak association to variants within the *DLG1* gene. The other three loci contain craniofacial  
389 super-enhancer regions. The top associations in the 7q22.1 locus are intronic to the *COL26A1*  
390 and *RANBP3* genes, both reported as having a blood phenotype (UCSC genome browser,  
391 <https://genome.ucsc.edu/index.html>). It is interesting to note that the previously reported  
392 genome-wide linkage and targeted region study of Pitt-OFC pedigree subsets based on cleft  
393 types [21] reported two regions – 9q21.33 and 14q21.3 – that were associated at a suggestive  
394 level of significance in our study, although the current associations do not lie within the fine-  
395 mapped regions analyzed in the former study.

396 The analysis of CL and CLP as a single phenotype (CL/P) in the [CL+CLP] families did not  
397 produce unique associations, as would be expected if these families were segregating for genes  
398 that cause a continuum of the CL/P phenotype. This lack of association may further support the  
399 hypothesis that CL/P is not a single phenotype etiologically. Further, we hypothesize that our  
400 family subtype-based analyses show evidence of genetic heterogeneity even within the cleft

401 subtypes CL and CLP themselves. For example, association of CL to *TANC2* is much stronger in  
402 the [CL] families than in the [CL+CLP] families, while the reverse is true at the 3q29 locus.  
403 Finally, our study outcomes show consistently stronger and more reliable associations for the  
404 CL-based subtypes (5 previously known and novel loci) as compared to the CLP-based subtypes  
405 (a single novel locus), although the sample sizes for the CLP-based subtypes are larger. Our  
406 study results recapitulated the association of *IRF6* with CL [24]. We thus hypothesize that CL is  
407 genetically more homogeneous than CLP. A possible alternative to genetic heterogeneity would  
408 be phenotypic heterogeneity: there exists diagnostic uncertainty with the palate phenotype, it is  
409 sometimes left undiagnosed, or, in some cases, the presence of submucous CP along with CL is  
410 not categorized as CLP. However, Pitt-OFC subjects were thoroughly examined for submucous  
411 CP and VPI, so this would be unlikely to have happened on large enough scale to impact our  
412 analysis outcomes.

413 This study makes an important contribution to the study of heterogeneity between OFC types  
414 using a study design where both the individuals as well as the family's OFC types are  
415 incorporated. The idea that genetically related individuals also tend to have the same type of  
416 OFC more often than different types of OFCs (REF), has been rarely utilized in running GWASs  
417 of OFC subtypes. Our study provides a methodology for incorporating the proband's relatives'  
418 cleft types within the GWAS framework, and the observed outcomes provide valuable insight  
419 into etiological differences between OFC subtypes.

420

## 421 **METHODS**

### 422 **Study sample**

423 Our study sample consists of participants from the multiethnic Pittsburgh Orofacial Cleft  
424 study (Pitt-OFC) [12], including a variety of pedigree structures and sizes, and including both  
425 simplex as well as multiplex families. Sample recruitment was carried out in accordance with  
426 ethics approval procedures at the University of Pittsburgh, the coordinating center for the Pitt-  
427 OFC study, as well as the respective institutions that contributed samples to the Pitt-OFC study.  
428 Genotyping was carried out at the Center for Inherited Disease Research (CIDR) at Johns  
429 Hopkins University, on an Illumina chip for approximately 580,000 variants genome-wide as  
430 summarized previously [12, 13], and available from dbGaP (**dbGaP Study**  
431 **Accession:** phs000774.v2.p1). The CIDR coordinating center at the University of Washington  
432 was also responsible for ensuring the quality of called genotypes. Subsequently, genotypes were  
433 imputed using the “1000 genome project phase 3” reference panel, at approximately 35,000,000  
434 variants of the GrCH37 genome assembly. Genotyping, quality control, and imputation steps  
435 were previously described in detail in Leslie et al. [12].

436 The full sample – POFC – utilized in our current study includes 2,218 individuals affected  
437 with CL or CLP, and 4,537 unaffected relatives from 1,939 families that contain members  
438 affected with CL and/or CLP. The types of OFCs present in a pedigree were obtained by direct  
439 participation by affected individuals and/or by a reported family history of OFCs. An additional  
440 2,673 unaffected individuals from 1,474 families with no reported history of an OFC (referred to  
441 as Controls) are included in the association analysis. Participants from pedigrees containing  
442 individuals affected with a cleft palate only (CP), or having a reported family history of CP were  
443 excluded from this study.

444

## 445 **Definition of subtypes**

446 Several subsets were created from the POFC sample based on the types of OFCs reported  
447 within pedigrees, as follows. First, the pedigrees were partitioned into three non-overlapping  
448 subsets, (i) [CL]: pedigrees that contain individuals affected with CL only, but not members  
449 affected with CLP, (ii) [CLP]: pedigrees that contain individuals affected with CLP but not  
450 members affected with CL only, and (iii) [CL+CLP]: pedigrees containing some members  
451 affected with CL only as well as some members affected with CLP. The partitioning of pedigrees  
452 into these three subsets used all available phenotypic and relationship information, including  
453 phenotypic information from pedigree members who were not genotyped. Two additional  
454 subsets were then defined, (iv) [CL+], all pedigrees with any CL-affected member, i.e. the union  
455 of [CL] and [CL+CLP], and (v) [CLP+], all pedigrees with any CLP-affected member, i.e. the  
456 union of [CLP] and [CL+CLP]. The [CL+] and [CLP+] subsets are not disjoint, i.e. they both  
457 contain subjects from [CL+CLP] pedigrees.

458 Eight GWAS phenotypic subtypes were then defined for these five subsets of pedigrees for  
459 running genome-wide association analysis, and affection statuses assigned to pedigree members  
460 belonging to each of the eight phenotypic subtypes as described below. The 2,673 Controls were  
461 included in each of the GWASs.

462 (A)  $CL/P_{[POFC]}$  – Within the full POFC sample, participants with either a CL, or CLP were set to  
463 affected, participants without any OFC were set to unaffected.

464 (B)  $CL_{[CL]}$  – Within the [CL] pedigrees - group (i) above, participants with CL were set to  
465 affected, and those without CL were set to unaffected.

466 (C)  $CLP_{[CLP]}$  – Within the [CLP] group of pedigrees – group (ii), participants with CLP  
467 were set to affected, and those without CLP were set to unaffected.

468 (D)  $CL/P_{[CL+CLP]}$  – within the [CL+CLP] group of pedigrees – group (iii), participants with  
469 either CL or CLP were set to affected, and those without OFCs were set to unaffected.

470 (E)  $CL_{[CL+CLP]}$  – Within [CL+CLP] pedigrees – group (iii), participants with a CL only  
471 were set to affected, those with CLP were set to unknown (thereby excluding them  
472 from GWAS), and those without OFCs were set to unaffected.

473 (F)  $CLP_{[CL+CLP]}$  – Within [CL+CLP] pedigrees – group (iii), pedigree members with a  
474 CLP were set to affected, those with CL only were set to unknown (thereby  
475 excluding them from GWAS), and those without OFCs were set to unaffected.

476 (G)  $CL_{[CL+]}$  – Within the [CL+] – group (iv) pedigrees, participants with CL only were set to  
477 affected, those with CLP were set an unknown affection status (thereby excluding them  
478 from GWAS), and those without any OFC were set to unaffected.

479 (H)  $CLP_{[CLP+]}$  – Within the [CLP+] pedigrees – group (v), participants affected with CLP were  
480 set to affected, those with CL only were set to unknown (thereby excluding them from  
481 GWAS), and those without any OFC were set to unaffected.

482

483 Fig 1 shows the partitioning of POFC pedigrees into the eight phenotypic subsets and  
484 phenotype definitions within each of these phenotypic subsets that were used to run separate  
485 GWASs. For illustration purposes, each subtype is depicted as simple nuclear pedigree structures  
486 with three offspring, two of which are affected with CL or CLP, although a wide variety of  
487 family types are represented in this study. Simplex and multi-generation pedigrees were handled  
488 following the same procedure for grouping into subtypes. In addition to the type of pedigrees  
489 included in each subset, Fig 1 also depicts affected and unaffected members, as well as those



490 assigned an unknown affection status, thereby excluding these members from the corresponding  
491 GWAS.

## 492 **Genome wide association**

493 We have shown previously that the degree of OFC risk at certain susceptibility loci varies  
494 with ancestry of the sample participants [22]. In order to control for this variance, we first  
495 classified subjects into four different genetically defined ancestry groups using the principal  
496 component analysis-based classification defined in a previous study using POFC subjects [12].  
497 For each of the eight GWAS phenotypic samples defined above and shown in Fig 1, we first  
498 analyzed each ancestry group separately, then combined the association outcomes using meta-  
499 analysis. The four ancestry-based groups were: AFR (participants of African origin), ASIA  
500 (participants of Asian origin), EUR (those of European white origin), and CSA (participants of  
501 Central and Southern American origin). Table 3 shows the breakdown of the analysis sample by  
502 ancestry, pedigree type, and affection status.

503 Individual GWASs were run using the mixed-model association program, GENESIS [25].  
504 GENESIS uses a genetic relationship matrix (GRM) estimated from the observed genotype data  
505 to account for population structure and familial relatedness, therefore, it is not necessary to  
506 correct for population admixture using ancestry PCs. The use of a GRM is necessary to account  
507 for population admixture within our ancestry-based subsets, which, in turn is due to the varying  
508 geographical origin of participants in each of these subsets (see Supplementary Table S2 for a  
509 breakdown by recruitment site). The genetic relationship matrix also provides an estimate of the  
510 polygenic variance component. Significance of association is based on the score test, comparing  
511 the maximum likelihood of disease outcomes conditional on observed genotypes at each variant  
512 to the maximum likelihood of the unconditional polygenic model. GENESIS reports approximate

513 effect sizes in the form of betas, i.e. the log-likelihood ratio of the conditional and unconditional  
 514 model) and standard error of the effect size. In this study, the effect allele is fixed across all  
 515 GWASs as the minor allele at each variant identified in the combined POFC sample.

516 Table 3. Counts of pedigrees and participants by GWAS, ancestry and affection status

| GWAS                           | CSA              |                    |       | EUR        |             |       | ASIA       |             |       | AFR        |             |     |
|--------------------------------|------------------|--------------------|-------|------------|-------------|-------|------------|-------------|-------|------------|-------------|-----|
|                                | <sup>†</sup> Ped | <sup>††</sup> Case | UFM   | Ped        | Case        | UFM   | Ped        | Case        | UFM   | Ped        | Case        | UFM |
| <b>CL/P</b>                    | 954              | 1,050              | 1,889 | 511        | 569         | 1,373 | 321        | 445         | 1,081 | 153        | 154         | 194 |
| <b>CL<sub>[CL+]</sub></b>      | 219              | 166                | 523   | 181        | 153         | 586   | 164        | 171         | 620   | 57         | 59          | 60  |
| <b>CLP<sub>[CLP+]</sub></b>    | 847              | 884                | 1,667 | 427        | 416         | 1,123 | 260        | 274         | 890   | 96         | 95          | 134 |
| <b>CL<sub>[CL]</sub></b>       | 102              | 101                | 222   | 84         | 90          | 250   | 61         | 85          | 191   | 57         | 59          | 60  |
| <b>CLP<sub>[CLP]</sub></b>     | 725              | 762                | 1,336 | 328        | 339         | 787   | 157        | 184         | 461   | 96         | 95          | 134 |
| <b>CL<sub>[CL+CLP]</sub></b>   | 117              | 65                 | 301   | 97         | 63          | 336   | 103        | 86          | 429   | 0          | 0           | 0   |
| <b>CLP<sub>[CL+CLP]</sub></b>  | 122              | 122                | 301   | 99         | 77          | 336   | 103        | 90          | 429   | 0          | 0           | 0   |
| <b>CL/P<sub>[CL+CLP]</sub></b> | 127              | 187                | 301   | 99         | 140         | 336   | 103        | 176         | 429   | 0          | 0           | 0   |
|                                | <b>Ped</b>       | <b>Ctrl</b>        |       | <b>Ped</b> | <b>Ctrl</b> |       | <b>Ped</b> | <b>Ctrl</b> |       | <b>Ped</b> | <b>Ctrl</b> |     |
| <b>CONTROL<sup>†††</sup></b>   | 478              | 1,098              |       | 759        | 1,330       |       | 163        | 165         |       | 74         | 80          |     |

517 Note: <sup>†</sup>Ped=number of pedigrees, Case=number of affected individuals, <sup>††</sup>UFM=unaffected  
 518 family member related to a case; <sup>†††</sup>the CONTROL subset consists of individuals/families  
 519 with no known personal nor family history of OFCs, and are utilized in each GWAS – the  
 520 number of CONTROL subjects are listed in the Ctrl columns to complete counts of  
 521 unaffected GWAS subjects.

522  
 523 Ancestry-specific GWASs were then meta-analyzed for each of the eight GWAS phenotypes  
 524 using the inverse-variance method implemented in PLINK [26]. The reported odds ratios from  
 525 PLINK were converted to log-scale effect sizes, to conform to the GENESIS reported effects.  
 526 The 95% confidence intervals of betas were calculated under the assumption that the meta-  
 527 analysis p-values are distributed normally. All four ancestry-groups were meta-analyzed for the

528  $CL_{[CL+]}$  and  $CLP_{[CLP+]}$  subtypes. There are no AFR pedigrees containing both CL and CLP  
529 affected members, therefore, meta-analysis was conducted excluding the African samples (AFR)  
530 for the five family-subtypes ( $CL_{[CL]}$ ,  $CL_{[CL+CLP]}$ ,  $CLP_{[CLP]}$ ,  $CLP_{[CL+CLP]}$  and  $CL/P_{[CL+CLP]}$ ).

531

### 532 **Variant selection**

533 Genotyped and imputed variants that passed quality control, and had minor allele frequencies  
534 of 2% or more within their respective GWAS sample subsets were used to run association. The  
535 observed minor allele frequencies of reported loci were checked against values obtained from the  
536 gnomAD database [27] to guard against imputation inaccuracy.

537

### 538 **Identification of novel associations**

539 For each genome-wide meta-analysis, variants showing association p-values below  $1.0E-06$   
540 were selected for further investigation, and grouped into association peaks measuring 1MB or  
541 less. We then checked for overlap between our associations peaks with the 29 genomic regions  
542 listed as harboring known OFC genes by Beaty et al. [28] as well as associated regions reported  
543 by six recently published OFC GWAS studies. The six recent GWASs include (1) combined  
544 meta-analysis of parent-offspring trio and case-control cohorts from the current Pitt-OFC  
545 multiethnic study sample [12], (2) meta-analysis of the cohorts used in (1) with another OFC  
546 sample consisting of European and Asian participants [13], (3) GWAS of cleft lip with cleft  
547 palate in Han Chinese samples [18], (4) GWAS of cleft lip only and cleft palate only in Han  
548 Chinese [19], (5) GWAS of cleft lip with or without cleft palate in Dutch and Belgian  
549 participants [29] and (6) GWAS of sub-Saharan African participants from Nigeria, Ghana,  
550 Ethiopia and the Republic of Congo [30].

551 For each OFC gene, we checked if any our 1 MB association peaks overlapped with the span  
552 of the gene, as determined by its start and end transcription sites. The base pair positions for start  
553 and end transcription sites were obtained from the UCSC genome browser  
554 (<https://genome.ucsc.edu/index.html>) mapped to the February 2009 (GRCh37) assembly. For the  
555 8q24.21 locus, which is a gene desert, we checked whether any of our associated SNPs were  
556 located in the 8q24.21 chromosome band. The distance between variants published by the six  
557 recent GWASs and our variants with p-values below 1.0E-06 were similarly measured, and a  
558 positive overlap reported if this distance was less than 500 Kb.

559

#### 560 **Comparison of association outcomes between subtypes**

561 Within each peak region the variant with the smallest meta-analysis association p-value  
562 observed for each of the eight subtypes were selected and their effect sizes compared. Effect size  
563 of each variant is represented by the beta coefficient of the SNP main effect under an additive  
564 model of inheritance, setting the minor allele (based on the entire POFC study sample) as the  
565 effect allele. Effect size and magnitude were compared across subtypes for the variants selected  
566 for each subtype to determine whether the 95% confidence intervals of effect size estimates  
567 overlapped. Next, LD  $r^2$  between selected variants at each locus was calculated using the PLINK  
568 program and the set of genotyped founders in the full POFC sample, irrespective of their OFC  
569 status. Finally, the observed effect allele frequency (EAF) within cases from the two GWASs  
570 were examined to assess whether these differed significant between cleft subtypes. We have  
571 previously shown that ancestry impacts association to CL/P in our POFC sample [22]; therefore,  
572 we examined the subtype-specific effect sizes within each ancestry group to assess whether the  
573 differences observed were similar to the those observed for the meta-analysis. EAFs within cases

574 were also compared across the eight phenotypic subtypes within each ancestry group in addition  
575 to the cases pooled across ancestry groups for each phenotypic subset. In our study, we did not  
576 carry out a statistical test (e.g. Cochran's Q statistic) to compare association outcomes from the  
577 OFC subtypes, as the unaffected relatives of OFC subjects and subjects from control families  
578 were used in the GWAS of more than one subtype; therefore, we relied mainly on qualitative  
579 evaluation of differences in the association outcomes.

## 580 **ACKNOWLEDGEMENTS**

581 The authors wish to thank the participant families worldwide, without whom this research  
582 would not have been possible. Special thanks to Dr. Eduardo Castilla (deceased), Dr. Juan C.  
583 Mereb, Dr. Andrew Czeizel, and to the devoted staff at the many recruitment sites. This work  
584 was supported by grants from the National Institutes of Health including: X01-HG007485  
585 [MLM], R01-DE016148 [MLM, SMW], U01-DE024425 [MLM], R37-DE008559 [JCM,  
586 MLM], R01-DE009886 [MLM], R21-DE016930 [MLM], R01-DE014667 [LMM], R21-  
587 DE016930 [MLM], R01-DE012472 [MLM], R01-DE011931 [JTH], U01-DD000295 [GLW],  
588 R00-DE025060 [EJL], R01-DE028342 [EJL], R01-DE28300 [AB]. Genotyping and data  
589 cleaning were provided via an NIH contract to the Johns Hopkins Center for Inherited Disease  
590 Research: HHSN268201200008I. Additional support provided by: an intramural grant from the  
591 Research Institute of the Children's Hospital of Colorado [FWD]; operating costs support in the  
592 Philippines was provided by the Institute of Human Genetics, National Institutes of Health,  
593 University of the Philippines, Manila [CP]; grants through FAPERJ [IMO].

## 594 **BIBLIOGRAPHY**

595 1. Nidey N, Moreno Uribe LM, Marazita MM, Wehby GL. Psychosocial well-being of  
596 parents of children with oral clefts. *Child: care, health and development*. 2016;42(1):42-50.

- 597 2. Wehby GL, Cassell CH. The impact of orofacial clefts on quality of life and healthcare  
598 use and costs. *Oral diseases*. 2010;16(1):3-10.
- 599 3. Berk NW, Marazita ML. The Costs of Cleft Lip and Palate: Personal and Societal  
600 Implications. In: Wyszynski DF, editor. *Cleft Lip and Palate: From Origin to Treatment*. Oxford:  
601 Oxford University Press; 2002.
- 602 4. Nidey N, Wehby G. Barriers to Health Care for Children with Orofacial Clefts: A  
603 Systematic Literature Review and Recommendations for Research Priorities. *Oral Health and*  
604 *Dental Studies*. 2019;2(1):2.
- 605 5. Naros A, Brocks A, Kluba S, Reinert S, Krimmel M. Health-related quality of life in cleft  
606 lip and/or palate patients - A cross-sectional study from preschool age until adolescence. *Journal*  
607 *of cranio-maxillo-facial surgery : official publication of the European Association for Cranio-*  
608 *Maxillo-Facial Surgery*. 2018;46(10):1758-63.
- 609 6. Bille C, Winther JF, Bautz A, Murray JC, Olsen J, Christensen K. Cancer risk in persons  
610 with oral cleft--a population-based study of 8,093 cases. *American journal of epidemiology*.  
611 2005;161(11):1047-55.
- 612 7. Bui AH, Ayub A, Ahmed MK, Taioli E, Taub PJ. Association Between Cleft Lip and/or  
613 Cleft Palate and Family History of Cancer: A Case-Control Study. *Annals of plastic surgery*.  
614 2018;80(4 Suppl 4):S178-s81.
- 615 8. Taioli E, Ragin C, Robertson L, Linkov F, Thurman NE, Vieira AR. Cleft lip and palate  
616 in family members of cancer survivors. *Cancer investigation*. 2010;28(9):958-62.
- 617 9. Dixon MJ, Marazita ML, Beaty TH, Murray JC. Cleft lip and palate: understanding  
618 genetic and environmental influences. *Nature reviews Genetics*. 2011;12(3):167-78.

- 619 10. Marazita ML, Leslie EJ. Genetics of Nonsyndromic Clefting. In: Losee J, Kirschner R,  
620 editors. *Comprehensive Cleft Care*. Second ed. Boca Raton, FL: CRC Press; 2016. p. 207-24.
- 621 11. Moreno Uribe LM, Marazita ML. Epidemiology, Etiology and Genetics of Orofacial  
622 Clefting. In: Shetye P, Gibson TL, editors. *Cleft and Craniofacial Orthodontics*: Wiley; In press.
- 623 12. Leslie EJ, Carlson JC, Shaffer JR, Feingold E, Wehby G, Laurie CA, et al. A multi-ethnic  
624 genome-wide association study identifies novel loci for non-syndromic cleft lip with or without  
625 cleft palate on 2p24.2, 17q23 and 19q13. *Human molecular genetics*. 2016;25(13):2862-72.
- 626 13. Leslie EJ, Carlson JC, Shaffer JR, Butali A, Buxo CJ, Castilla EE, et al. Genome-wide  
627 meta-analyses of nonsyndromic orofacial clefts identify novel associations between FOXE1 and  
628 all orofacial clefts, and TP63 and cleft lip with or without cleft palate. *Hum Genet*.  
629 2017;136(3):275-86.
- 630 14. Harville EW, Wilcox AJ, Lie RT, Vindenes H, Abyholm F. Cleft lip and palate versus  
631 cleft lip only: are they distinct defects? *American journal of epidemiology*. 2005;162(5):448-53.
- 632 15. Groesen D, Chevrier C, Skytthe A, Bille C, Mølsted K, Sivertsen A, et al. A cohort study  
633 of recurrence patterns among more than 54,000 relatives of oral cleft cases in Denmark: support  
634 for the multifactorial threshold model of inheritance. *J Med Genet*. 2010;47(3):162-8.
- 635 16. Carlson JC, Anand D, Butali A, Buxo CJ, Christensen K, Deleyiannis F, et al. A  
636 systematic genetic analysis and visualization of phenotypic heterogeneity among orofacial cleft  
637 GWAS signals. *Genetic epidemiology*. 2019;43(6):704-16.
- 638 17. Carlson JC, Taub MA, Feingold E, Beaty TH, Murray JC, Marazita ML, et al. Identifying  
639 Genetic Sources of Phenotypic Heterogeneity in Orofacial Clefts by Targeted Sequencing. *Birth*  
640 *defects research*. 2017;109(13):1030-8.

- 641 18. Yu Y, Zuo X, He M, Gao J, Fu Y, Qin C, et al. Genome-wide analyses of non-syndromic  
642 cleft lip with palate identify 14 novel loci and genetic heterogeneity. *Nature communications*.  
643 2017;8:14364.
- 644 19. Huang L, Jia Z, Shi Y, Du Q, Shi J, Wang Z, et al. Genetic factors define CPO and CLO  
645 subtypes of nonsyndromic orofacial cleft. *PLoS genetics*. 2019;15(10):e1008357.
- 646 20. Moreno Uribe LM, Fomina T, Munger RG, Romitti PA, Jenkins MM, Gjessing HK, et al.  
647 A Population-Based Study of Effects of Genetic Loci on Orofacial Clefts. *Journal of dental*  
648 *research*. 2017;96(11):1322-9.
- 649 21. Marazita ML, Lidral AC, Murray JC, Field LL, Maher BS, Goldstein McHenry T, et al.  
650 Genome scan, fine-mapping, and candidate gene analysis of non-syndromic cleft lip with or  
651 without cleft palate reveals phenotype-specific differences in linkage and association results.  
652 *Hum Hered*. 2009;68(3):151-70.
- 653 22. Mukhopadhyay N, Feingold E, Moreno-Uribe L, Wehby G, Valencia-Ramirez LC,  
654 Muneton CPR, et al. Genome-Wide Association Study of Non-syndromic Orofacial Clefts in a  
655 Multiethnic Sample of Families and Controls Identifies Novel Regions. *Front Cell Dev Biol*.  
656 2021;9:621482.
- 657 23. Mostowska A, Gaczowska A, Żukowski K, Ludwig KU, Hozyasz KK, Wójcicki P, et al.  
658 Common variants in DLG1 locus are associated with non-syndromic cleft lip with or without  
659 cleft palate. *Clinical genetics*. 2018;93(4):784-93.
- 660 24. Rahimov F, Marazita ML, Visel A, Cooper ME, Hitchler MJ, Rubini M, et al. Disruption  
661 of an AP-2alpha binding site in an IRF6 enhancer is associated with cleft lip. *Nature genetics*.  
662 2008;40(11):1341-7.



- 663 25. Gogarten S, Sofer T, Chen H, Yu C, Brody J, Thornton T, et al. Genetic association  
664 testing using the GENESIS R/Bioconductor package. *Bioinformatics*. 2019.
- 665 26. Chang CC, Chow CC, Tellier LC, Vattikuti S, Purcell SM, Lee JJ. Second-generation  
666 PLINK: rising to the challenge of larger and richer datasets. *GigaScience*. 2015;4(1).
- 667 27. Karczewski KJ, Francioli LC, Tiao G, Cummings BB, Alföldi J, Wang Q, et al. Variation  
668 across 141,456 human exomes and genomes reveals the spectrum of loss-of-function intolerance  
669 across human protein-coding genes. 2019:531210.
- 670 28. Beaty TH, Marazita ML, Leslie EJ. Genetic factors influencing risk to orofacial clefts:  
671 today's challenges and tomorrow's opportunities. *F1000Research*. 2016;5:2800.
- 672 29. van Rooij IA, Ludwig KU, Welzenbach J, Ishorst N, Thonissen M, Galesloot TE, et al.  
673 Non-Syndromic Cleft Lip with or without Cleft Palate: Genome-Wide Association Study in  
674 Europeans Identifies a Suggestive Risk Locus at 16p12.1 and Supports SH3PXD2A as a Clefting  
675 Susceptibility Gene. *Genes*. 2019;10(12).
- 676 30. Butali A, Mossey PA, Adeyemo WL, Eshete MA, Gowans LJJ, Busch TD, et al.  
677 Genomic analyses in African populations identify novel risk loci for cleft palate. *Human  
678 molecular genetics*. 2019;28(6):1038-51.
- 679

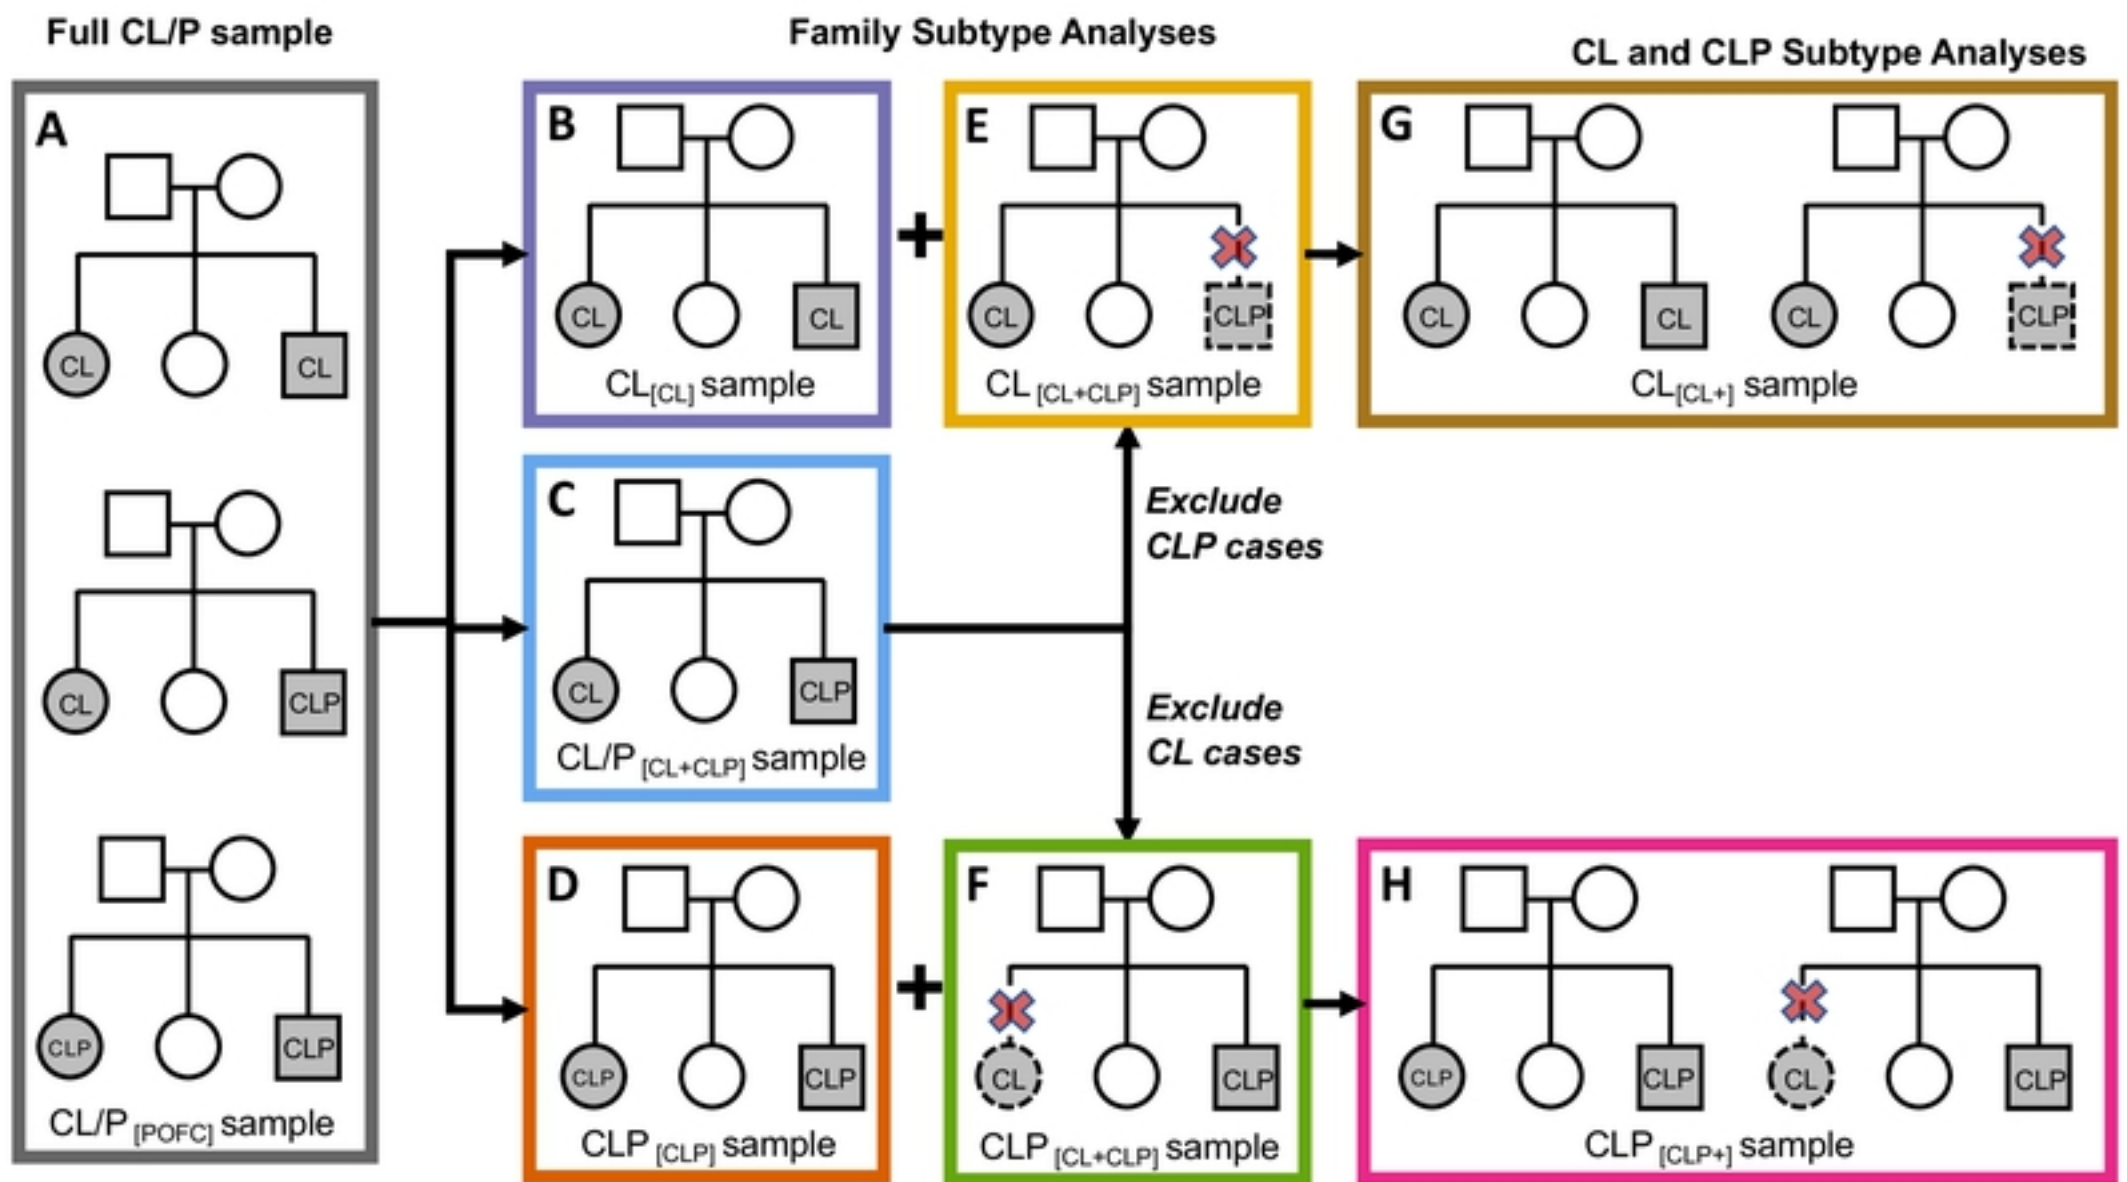

Figure 1

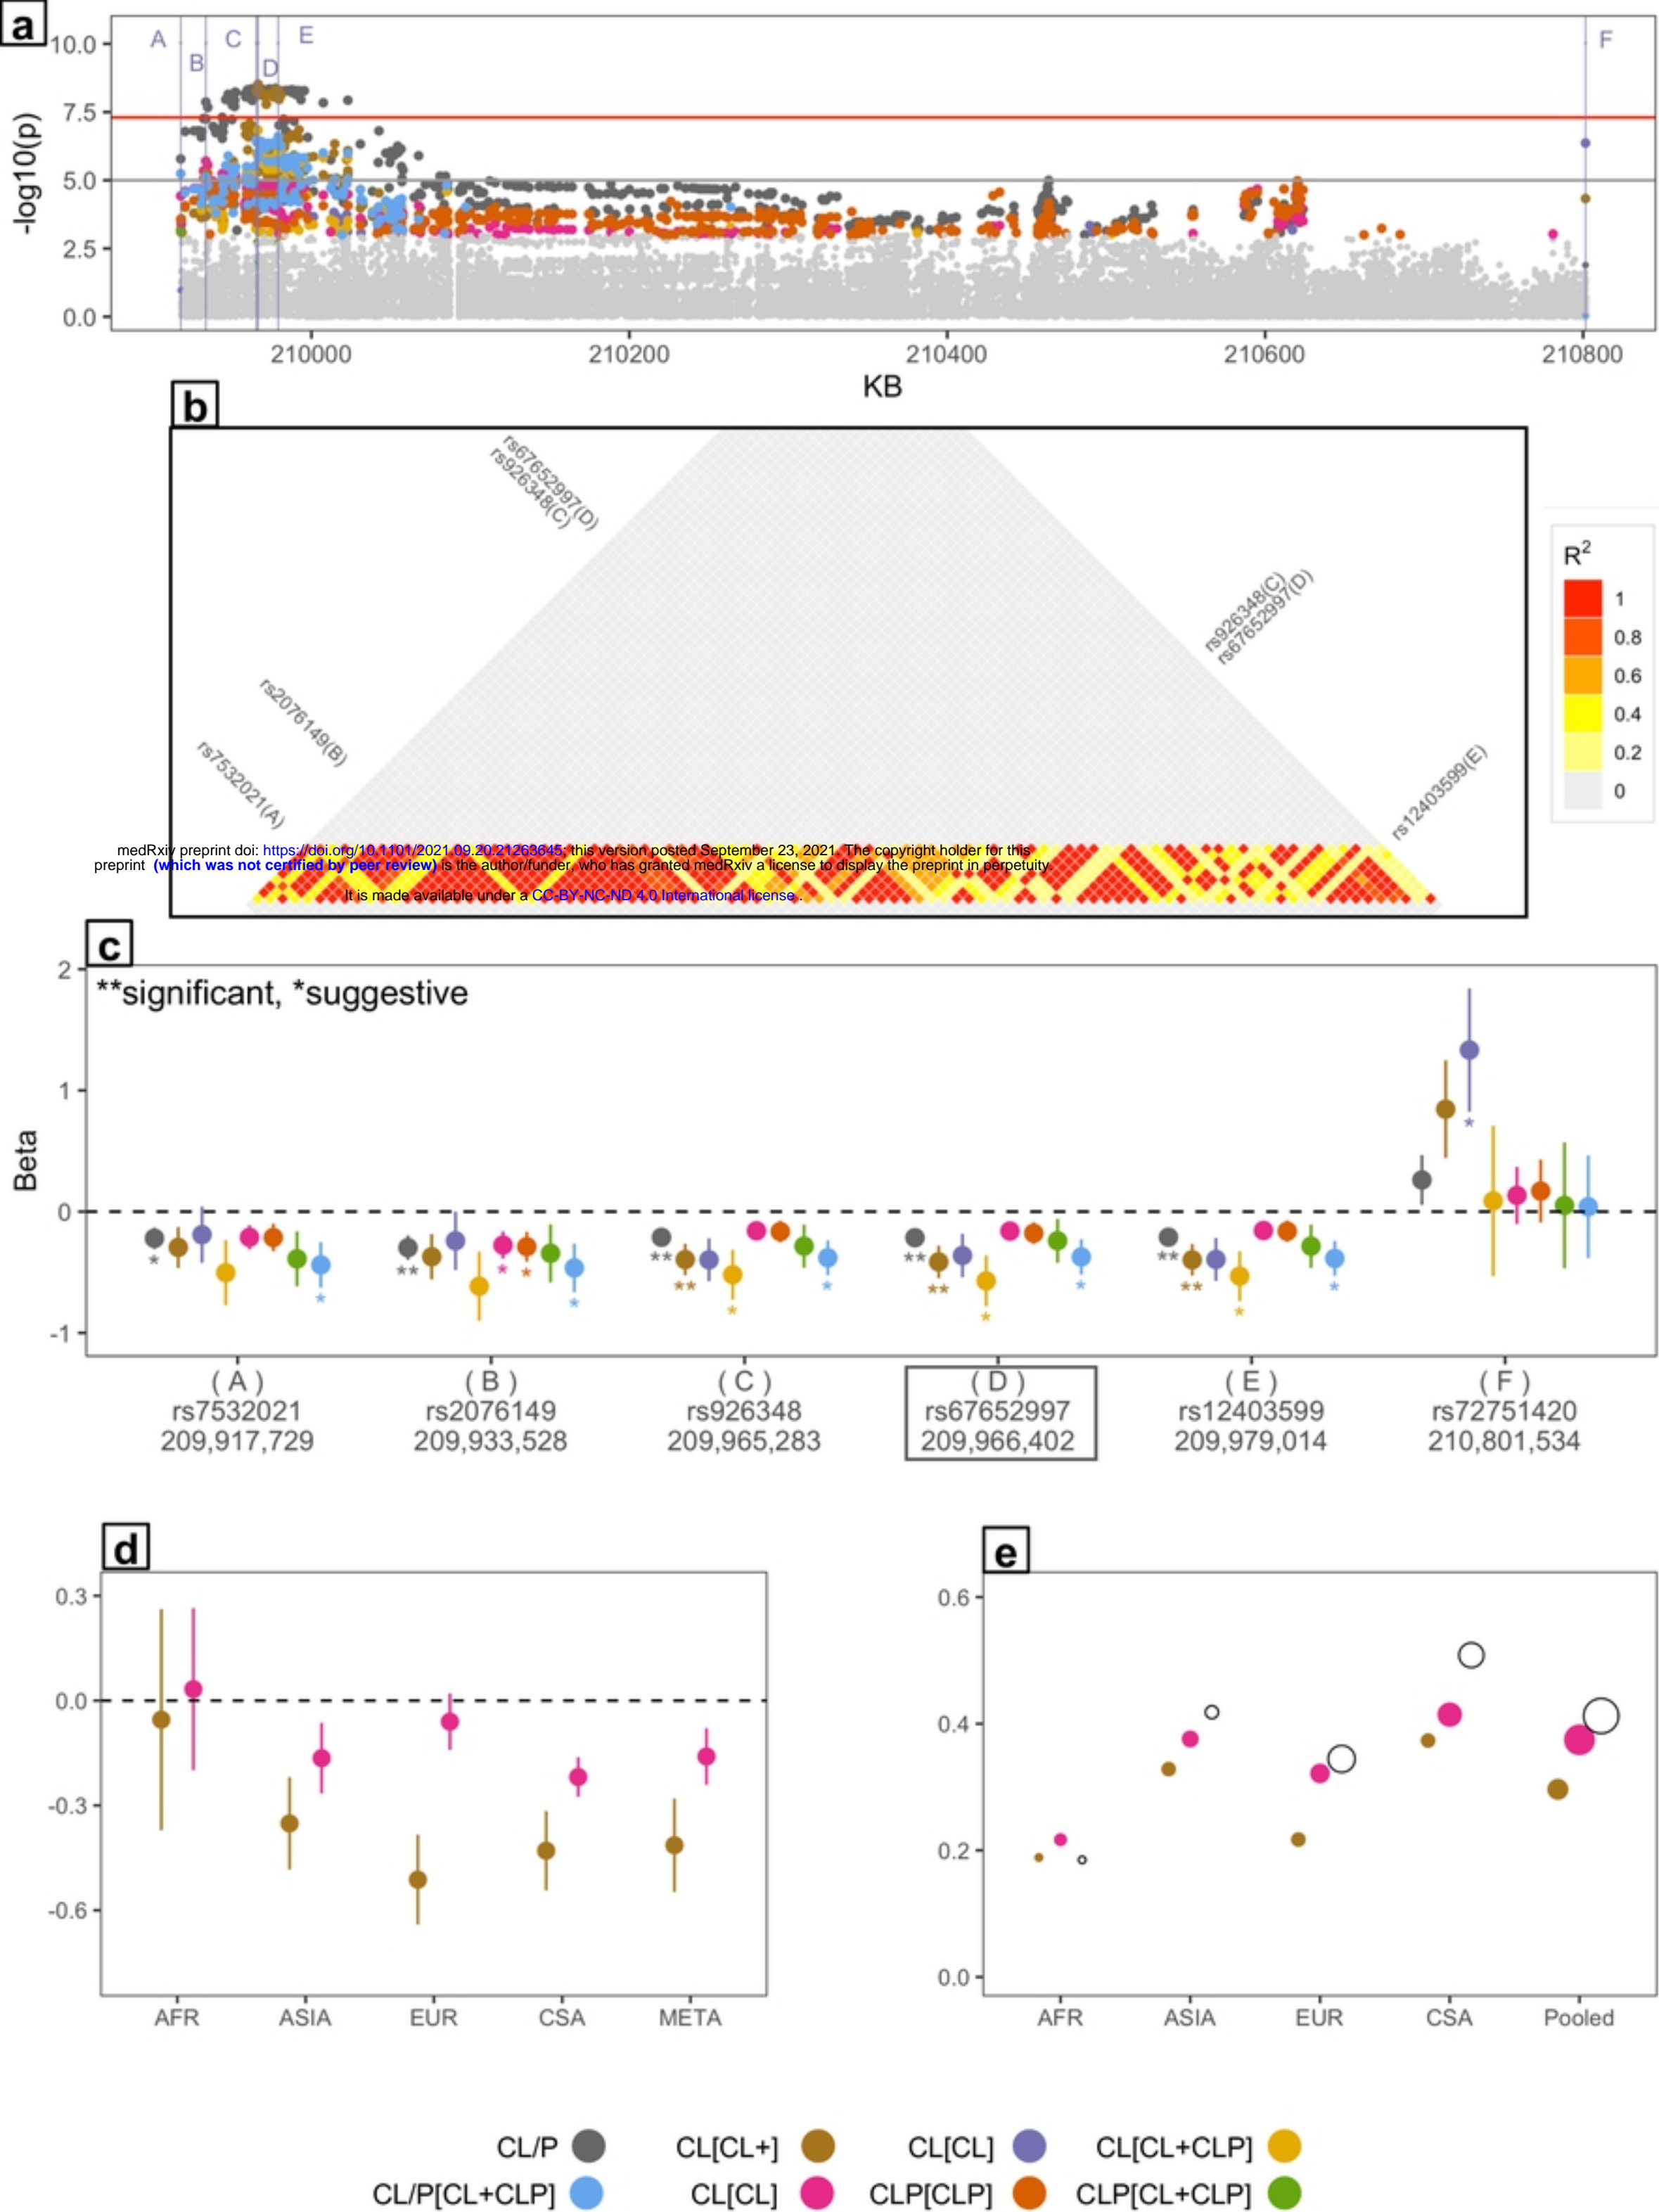

Figure 2

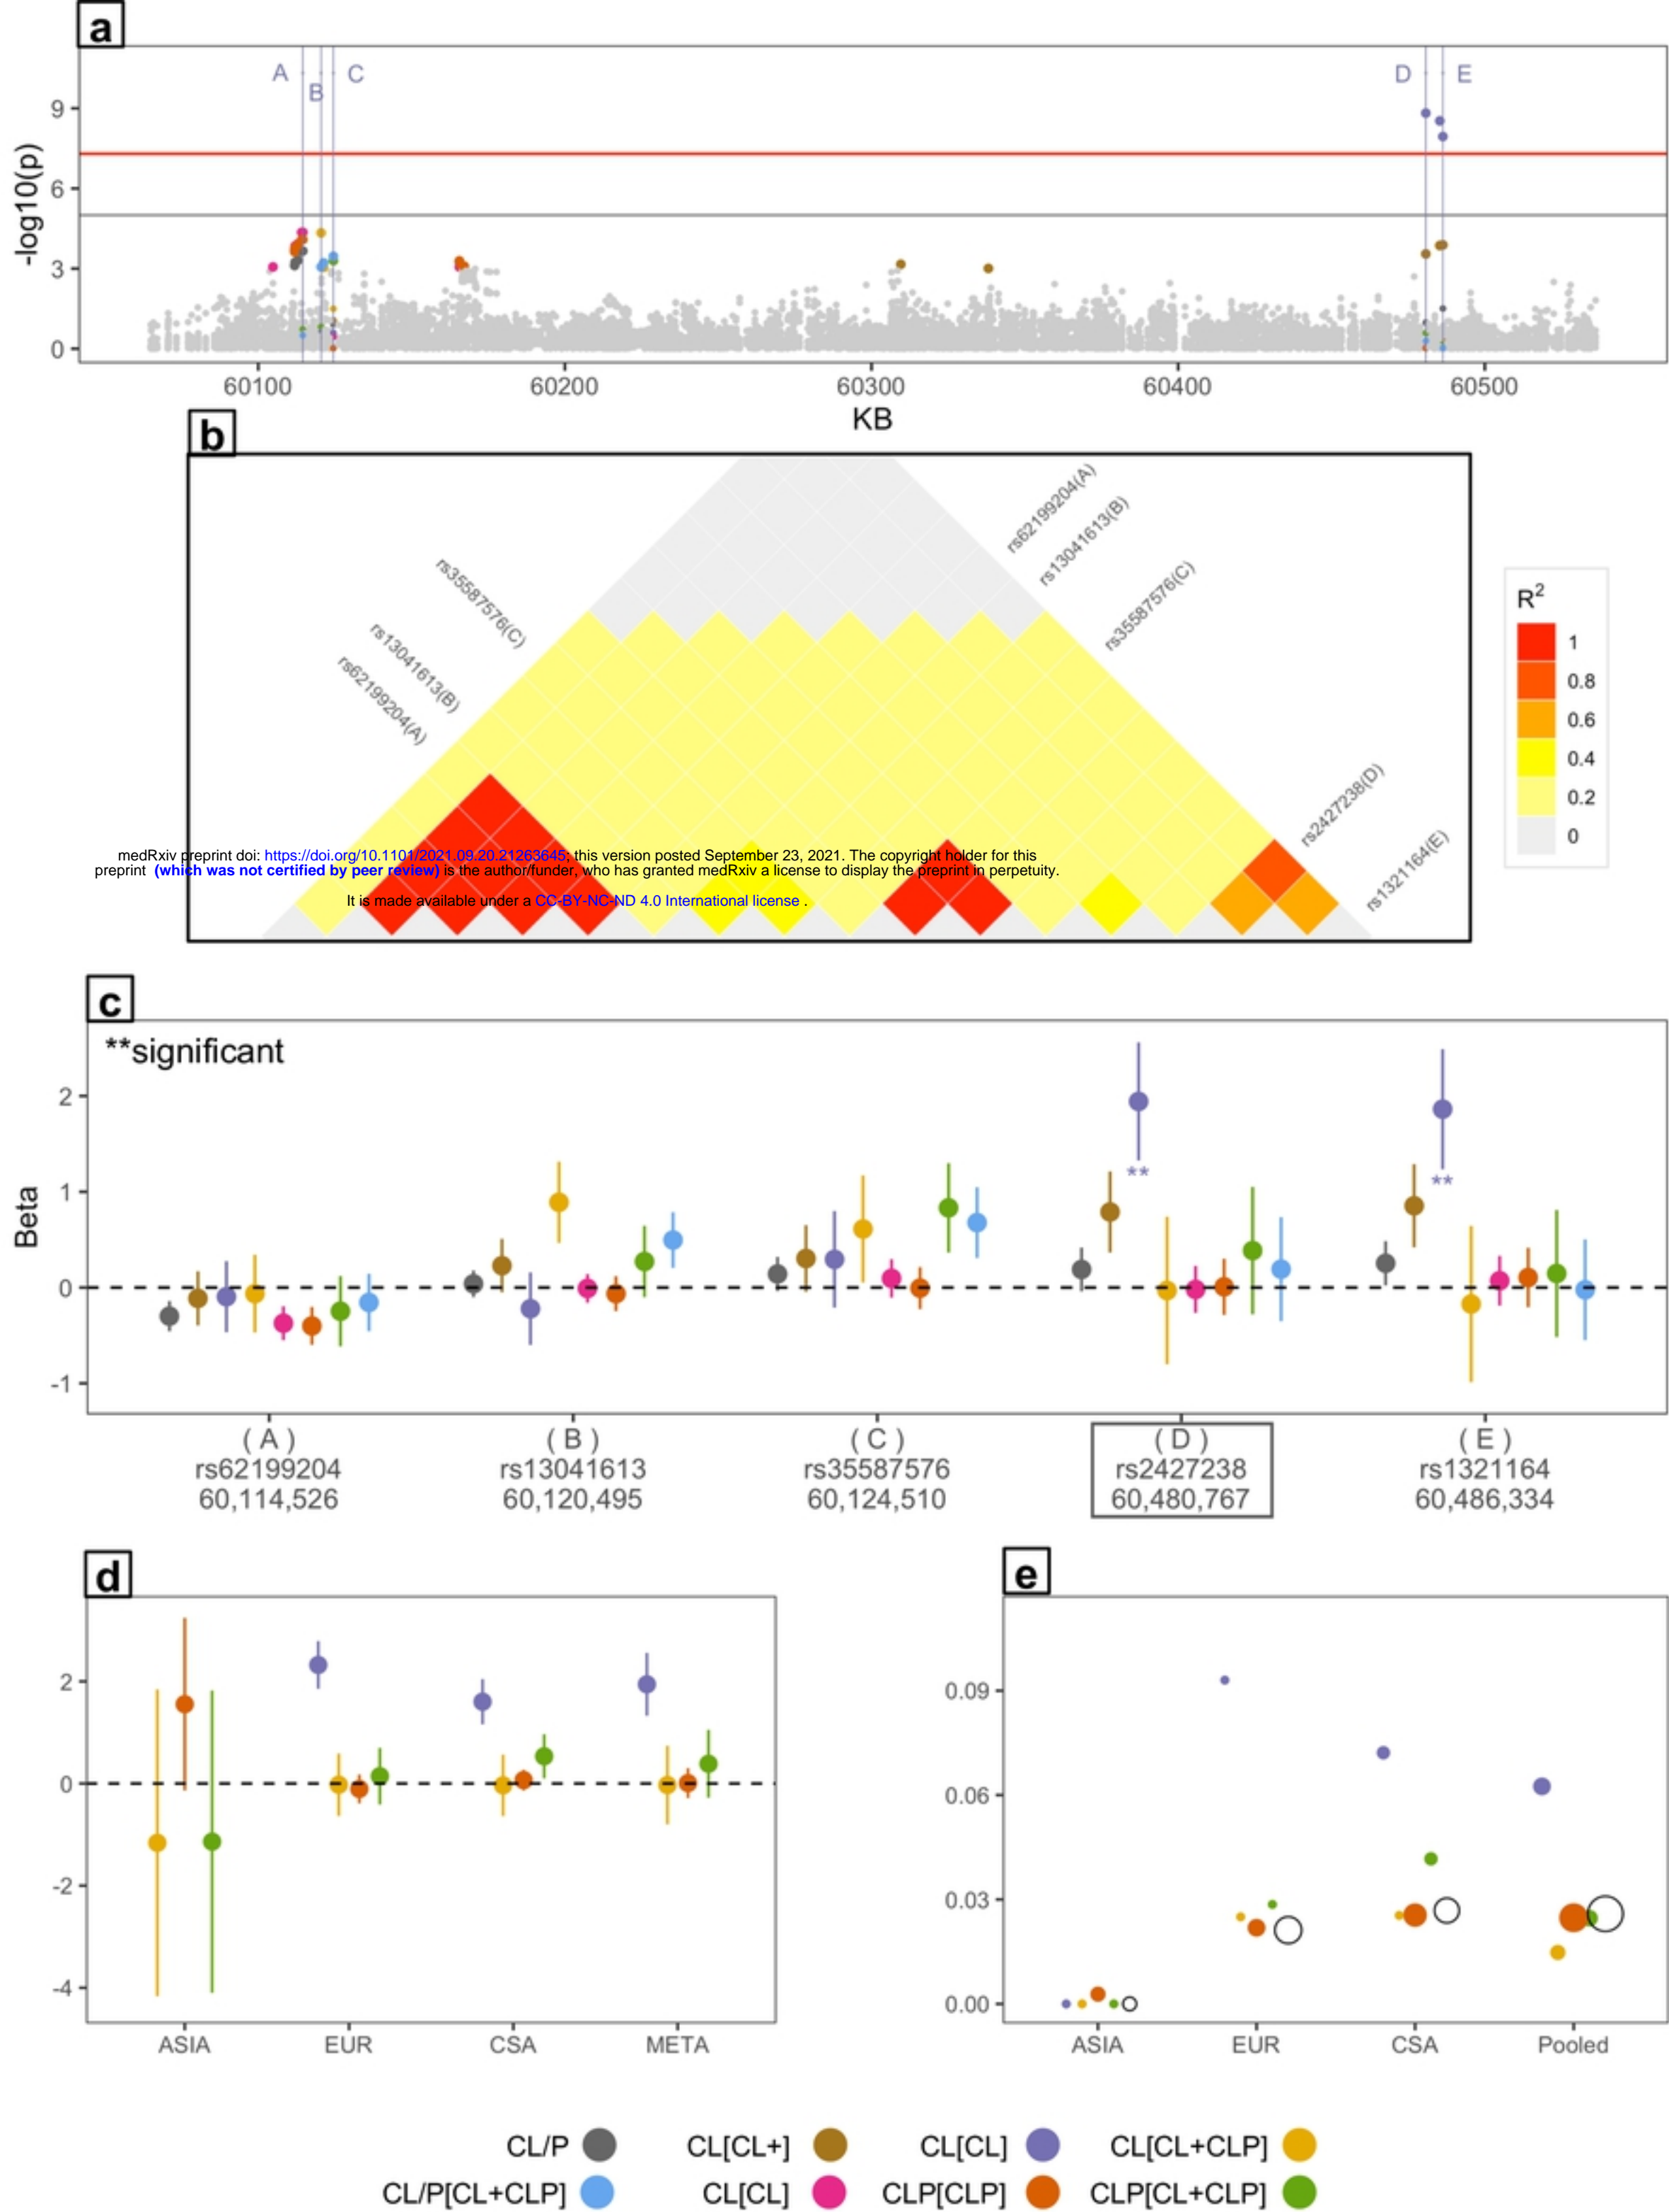

Figure 3

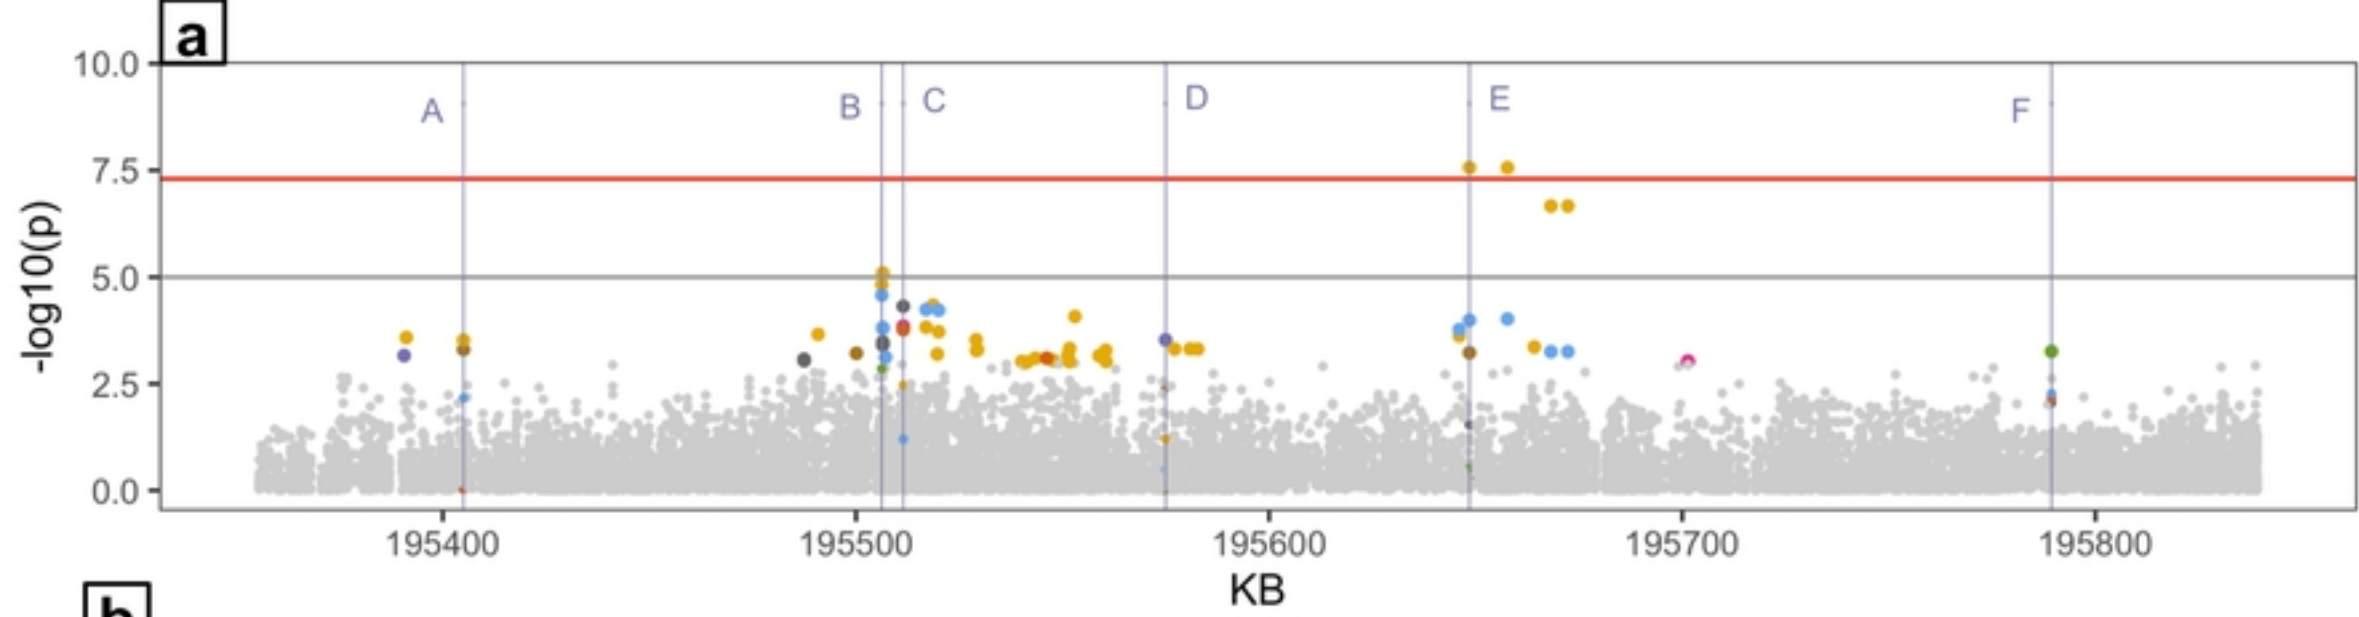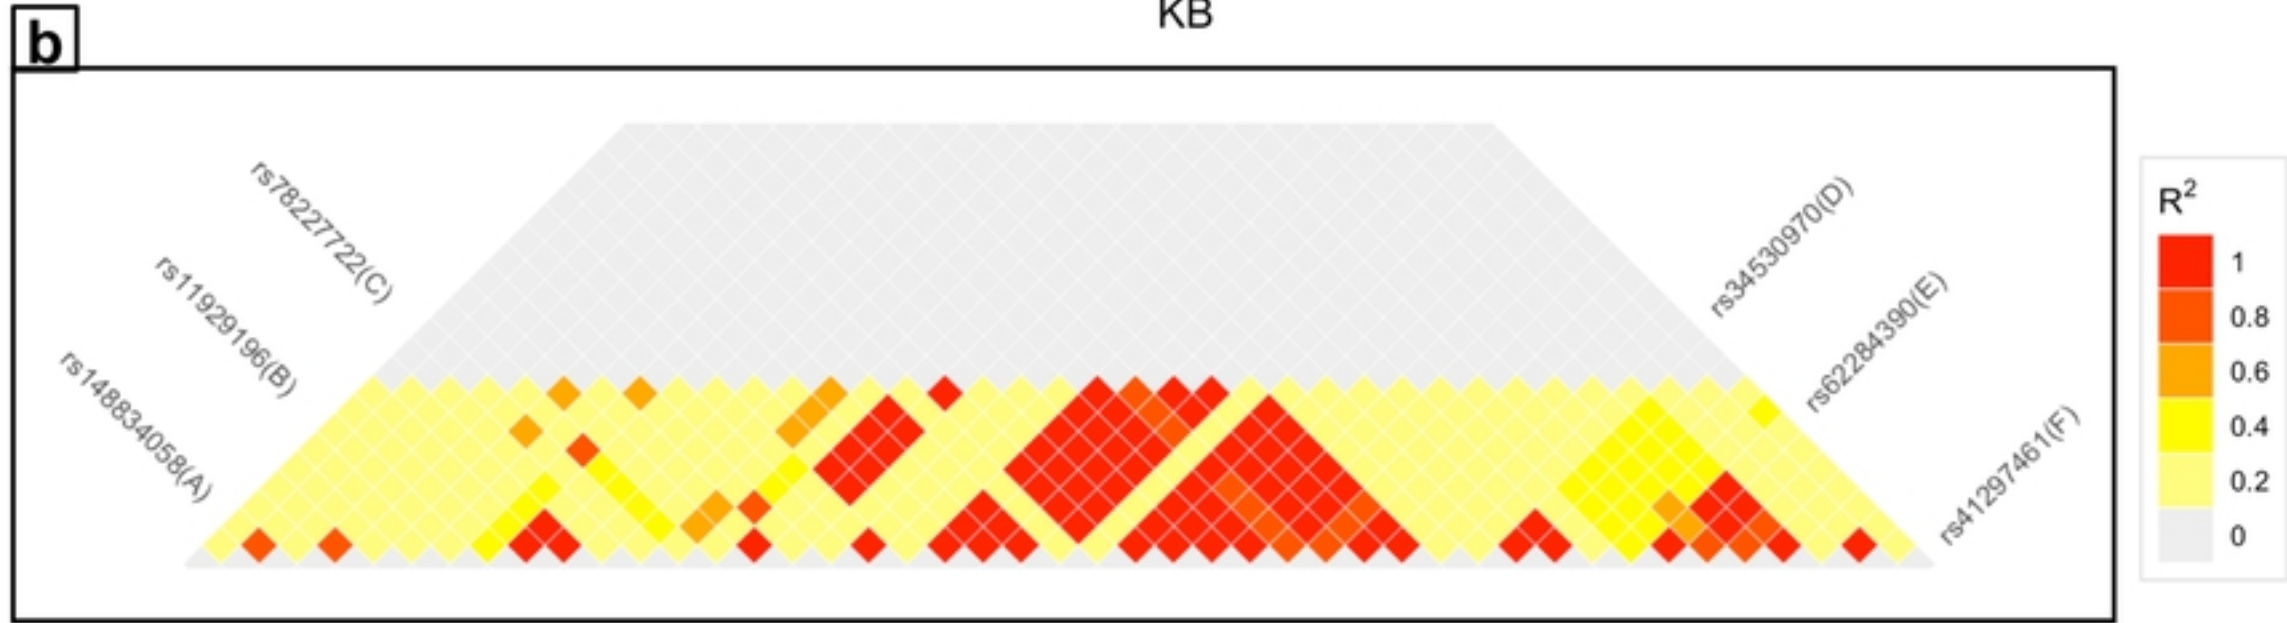

medRxiv preprint doi: <https://doi.org/10.1101/2021.09.20.21263645>; this version posted September 23, 2021. The copyright holder for this preprint (which was not certified by peer review) is the author/funder, who has granted medRxiv a license to display the preprint in perpetuity.

It is made available under a [CC-BY-NC-ND 4.0 International license](https://creativecommons.org/licenses/by-nc-nd/4.0/).

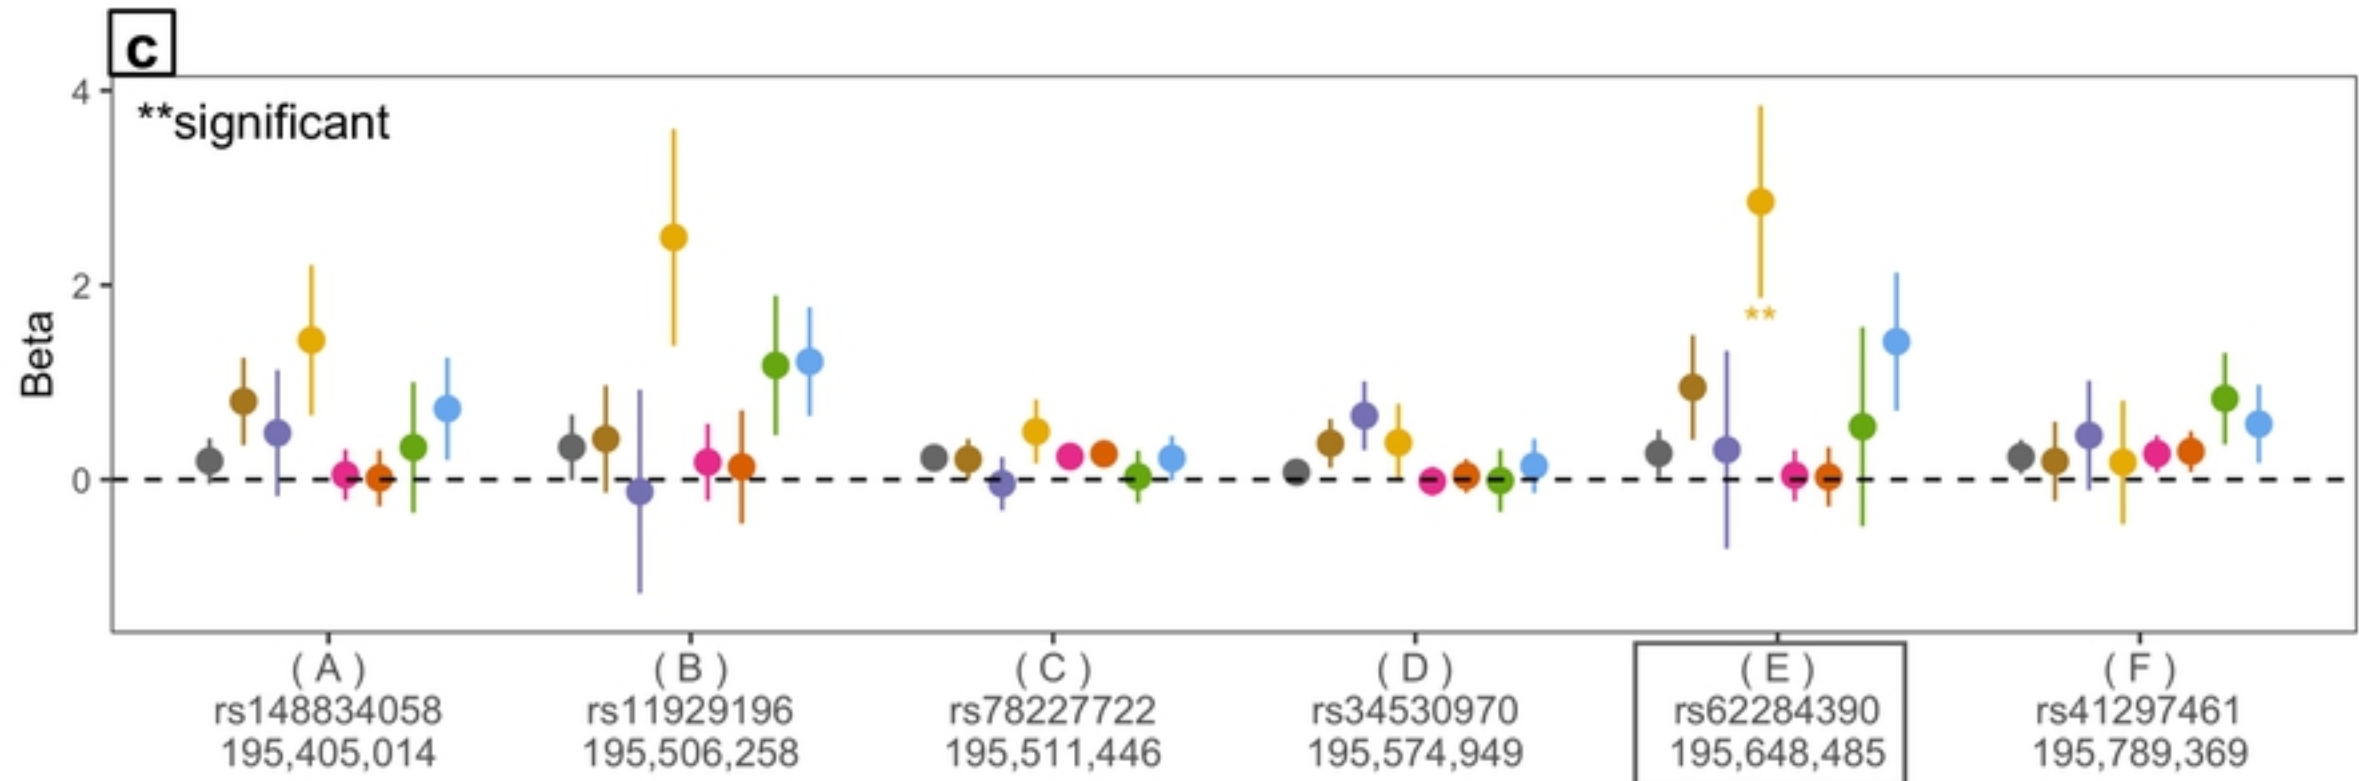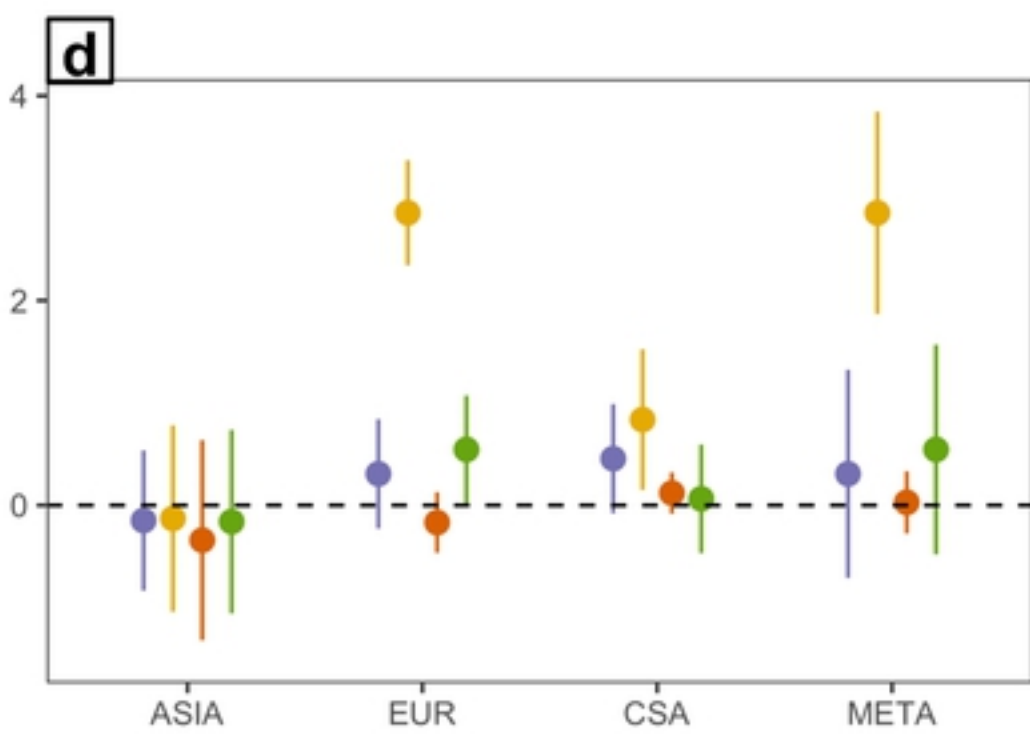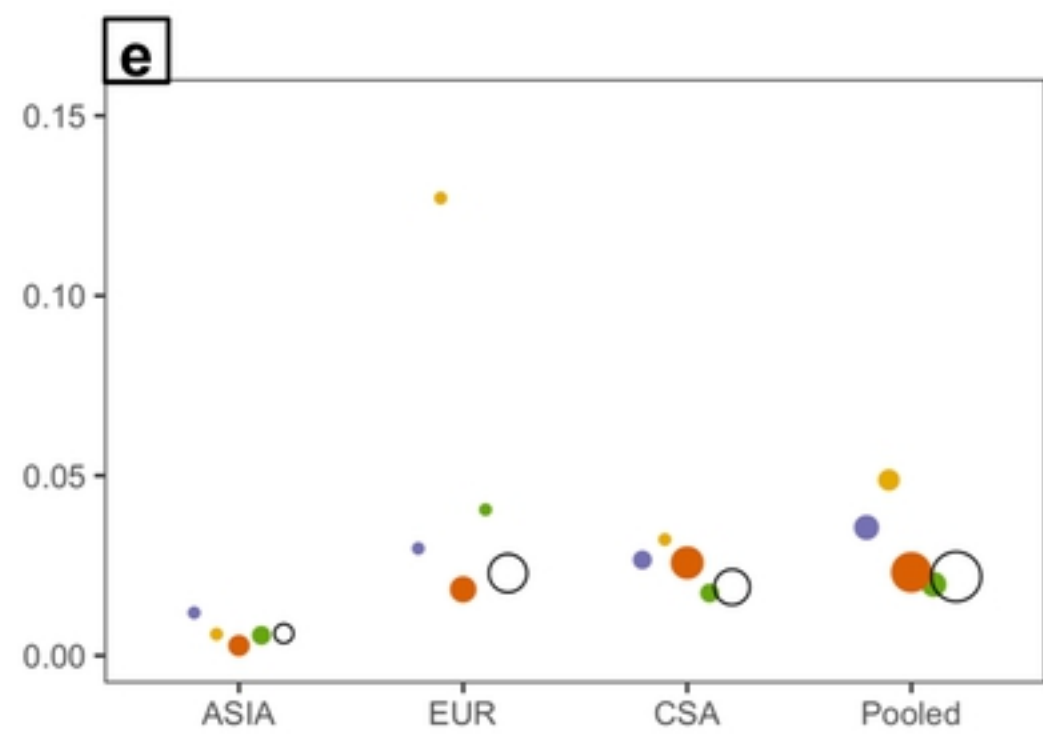

CL/P ● CL[CL+] ● CL[CL] ● CL[CL+CLP] ●  
 CL/P[CL+CLP] ● CL[CL] ● CLP[CLP] ● CLP[CL+CLP] ●

Figure 4
